# Supplementary material
Source: PubMed Central journal article supplement (PMC9706399)
Supplement: jamaneurol-e224166-s001.pdf [file jamaneurol-e224166-s001.pdf]

## Supplementary Online Content

Dhruva SS, Murillo J, Ameli O, et al. Long-term outcomes in use of opioids, nonpharmacologic pain interventions, and total costs of spinal cord stimulators compared with conventional medical therapy for chronic pain. *JAMA Neurol*. Published online November 28, 2022. doi:10.1001/jamaneurol.2022.4166

**eTable 1.** Cohort Identification and Evidence of Spinal Cord Stimulator Treatment and Conventional Medical Management

**eTable 2.** Identification of Individuals with Conditions for Study Exclusion

**eTable 3.** Code Lists for Pain Management Outcomes

**eTable 4.** Code List for Spinal Cord Stimulator-Related Complications, Revisions, and Removals

**eTable 5.** Comparison of Disenrolled and Retained Enrollees

**eTable 6.** Comparison of Patients With Trial Spinal Cord Stimulator Only and Patients Who Received Permanent SCS Placement

**eTable 7.** Complete List of Predictors and Odds Ratios Associated With Spinal Cord Stimulator Treatment

**eTable 8.** Rates of Opioid Discontinuation Among Patients With At Least 1 Opioid Fill During 6-Month Baseline Period

**eTable 9.** Pain and Health Care Utilization 24 Months After Permanent Spinal Cord Stimulator Implantation vs Conventional Medical Management Among Patients With Complex Regional Pain Syndrome and Chronic Pain Syndrome Diagnoses Only

**eTable 10.** Pain and Health Care Utilization 24 Months After Permanent Spinal Cord Stimulator Implantation vs Conventional Medical Management Among Patients With  $\leq 7$  Days Opioid Prescription During 6-Month Baseline Period

**eFigure 1.** Flow Diagram of Cohort Construction

**eFigure 2.** Overall Study Design Key Time Periods and Events

**eFigure 3.** Prematch and Postmatch Standardized Mean Difference

This supplementary material has been provided by the authors to give readers additional information about their work.

**eTable 1.** Cohort Identification and Evidence of Spinal Cord Stimulator Treatment and Conventional Medical Management

| <b>Cohort identification code list</b>                                            |                                                                                                                                                                                                                                                                                                                                                                                                                                                                                                                                                                                                                                                                                                                                                                                                                                                                                                                                                                                                                                                                                                                     |
|-----------------------------------------------------------------------------------|---------------------------------------------------------------------------------------------------------------------------------------------------------------------------------------------------------------------------------------------------------------------------------------------------------------------------------------------------------------------------------------------------------------------------------------------------------------------------------------------------------------------------------------------------------------------------------------------------------------------------------------------------------------------------------------------------------------------------------------------------------------------------------------------------------------------------------------------------------------------------------------------------------------------------------------------------------------------------------------------------------------------------------------------------------------------------------------------------------------------|
| Diagnosis Code - ICD-10                                                           | Failed Back Surgery Syndrome: M96.1<br>Complex Regional Pain Syndrome: G90.5x, G56.4x, G57.7x<br>Chronic Pain Syndrome: G89.4<br>Other post-surgical back and extremity pain: M54.1x, M51.1x, M50.1x                                                                                                                                                                                                                                                                                                                                                                                                                                                                                                                                                                                                                                                                                                                                                                                                                                                                                                                |
| <b>Spinal cord stimulator treatment</b>                                           |                                                                                                                                                                                                                                                                                                                                                                                                                                                                                                                                                                                                                                                                                                                                                                                                                                                                                                                                                                                                                                                                                                                     |
| Procedure Codes                                                                   | CPT: 63650, 63655, 63685, 63663, 63664, 63688, 63661, 63662, 95970, 95971, 95972<br><br>ICD-10: 00HU0MZ, 00HU3MZ, 00PU0MZ, 00PU3MZ, 00WU0MZ, 00WU3MZ, 0JH70DZ, 0JH80DZ, 0JH70EZ, 0JH80EZ, 0JPT0MZ, 0JPT3MZ, 0JWT0MZ, 0JWT3MZ<br><br>HCPCS: L8680, L8679, L8687, L8688, L8689, L8681, C1767, C1820, C1883, C1778, C1897, C1787<br><br>Incident trial SCS insertion: 63650, 63655<br><br>Conversion of trial to permanent SCS: 63685 within 12 months of lead insertion (CPT 63650, 63655)                                                                                                                                                                                                                                                                                                                                                                                                                                                                                                                                                                                                                            |
| <b>Additional spinal cord stimulator codes to evaluate clean period code list</b> |                                                                                                                                                                                                                                                                                                                                                                                                                                                                                                                                                                                                                                                                                                                                                                                                                                                                                                                                                                                                                                                                                                                     |
| Diagnosis Codes - ICD-10                                                          | T851xxx, Z45.42 or Z45.49, Z46.2, Z9682, Z45.42                                                                                                                                                                                                                                                                                                                                                                                                                                                                                                                                                                                                                                                                                                                                                                                                                                                                                                                                                                                                                                                                     |
| <b>Spinal surgeries</b>                                                           |                                                                                                                                                                                                                                                                                                                                                                                                                                                                                                                                                                                                                                                                                                                                                                                                                                                                                                                                                                                                                                                                                                                     |
| Procedure Codes                                                                   | CPT: 0095T, 0098T, 0163T, 0164T, 0165T, 0171T, 0172T, 0195T, 0196T, 0200T, 0201T, 0202T, 0219T, 0220T, 0221T, 0222T, 0274T, 0275T, 0282T, 0283T, 0309T, 0375T, 0609T, 0610T, 0611T, 0612T, 0627T, 0628T, 0629T, 0630T, 0639T, 20220, 20225, 20240, 20250, 20251, 20930, 20931, 20936, 20937, 20938, 20939, 22010, 22015, 22100, 22101, 22102, 22103, 22110, 22112, 22114, 22116, 22206, 22207, 22208, 22210, 22212, 22214, 22216, 22220, 22222, 22224, 22226, 22318, 22319, 22325, 22326, 22327, 22328, 22510, 22511, 22512, 22513, 22514, 22515, 22526, 22527, 22532, 22533, 22534, 22551, 22552, 22554, 22556, 22558, 22585, 22586, 22590, 22600, 22614, 22630, 22632, 22633, 22634, 22800, 22802, 22804, 22808, 22810, 22812, 22818, 22819, 22830, 22840, 22841, 22842, 22843, 22844, 22845, 22846, 22847, 22849, 22851, 22853, 22854, 22856, 22857, 22858, 22859, 22861, 22862, 22864, 22865, 22867, 22868, 22869, 22870, 27080, 27105, 27202, 27218, 61050, 61055, 61343, 61575, 61576, 61597, 61615, 61616, 61703, 62230, 62263, 62264, 62267, 62268, 62269, 62270, 62272, 62281, 62287, 62292, 62294, 62328, |

62329, 62350, 62351, 62380, 63001, 63003, 63005, 63011, 63012, 63015, 63016, 63017, 63020, 63030, 63035, 63040, 63042, 63043, 63044, 63045, 63046, 63047, 63048, 63050, 63051, 63055, 63056, 63057, 63064, 63066, 63075, 63076, 63077, 63078, 63081, 63082, 63085, 63086, 63087, 63088, 63090, 63091, 63101, 63102, 63103, 63170, 63172, 63173, 63180, 63182, 63185, 63190, 63191, 63194, 63195, 63196, 63197, 63198, 63199, 63200, 63250, 63251, 63252, 63265, 63266, 63267, 63268, 63270, 63271, 63272, 63273, 63275, 63276, 63277, 63278, 63280, 63281, 63282, 63283, 63285, 63286, 63287, 63290, 63295, 63300, 63301, 63302, 63303, 63304, 63305, 63306, 63307, 63308, 63600, 63610, 63615, 63650, 63655, 63661, 63662, 63663, 63664, 63685, 63688, 63700, 63702, 63704, 63706, 63707, 63709, 63710, 63740, 63741, 63744, 63746, 64633, 64634, 64635, 64636, 64640, 64772, 64802, 64804, 64809, 64818

ICD-10: 001U072, 001U074, 001U076, 001U077, 001U079, 001U0J2, 001U0J4, 001U0J6, 001U0J7, 001U0J9, 001U0K2, 001U0K4, 001U0K6, 001U0K7, 001U0K9, 001U372, 001U374, 001U376, 001U377, 001U379, 001U3J2, 001U3J4, 001U3J6, 001U3J7, 001U3J9, 001U3K2, 001U3K4, 001U3K6, 001U3K7, 001U3K9, 001U472, 001U474, 001U476, 001U477, 001U479, 001U4J2, 001U4J4, 001U4J6, 001U4J7, 001U4J9, 001U4K2, 001U4K4, 001U4K6, 001U4K7, 001U4K9, 002UX0Z, 002UXYZ, 005T0ZZ, 005T3ZZ, 005T4ZZ, 005W0ZZ, 005W3ZZ, 005W4ZZ, 005X0ZZ, 005X3ZZ, 005X4ZZ, 005Y0ZZ, 005Y3ZZ, 005Y4ZZ, 008W0ZZ, 008W3ZZ, 008W4ZZ, 008X0ZZ, 008X3ZZ, 008X4ZZ, 008Y0ZZ, 008Y3ZZ, 008Y4ZZ, 009T00Z, 009T0ZX, 009T0ZZ, 009T30Z, 009T3ZX, 009T3ZZ, 009T40Z, 009T4ZX, 009T4ZZ, 009U00Z, 009U0ZX, 009U0ZZ, 009U30Z, 009U3ZX, 009U3ZZ, 009U40Z, 009U4ZX, 009U4ZZ, 009W00Z, 009W0ZX, 009W0ZZ, 009W30Z, 009W3ZX, 009W3ZZ, 009W40Z, 009W4ZX, 009W4ZZ, 009X00Z, 009X0ZX, 009X0ZZ, 009X30Z, 009X3ZX, 009X3ZZ, 009X40Z, 009X4ZX, 009X4ZZ, 009Y00Z, 009Y0ZX, 009Y0ZZ, 009Y30Z, 009Y3ZX, 009Y3ZZ, 009Y40Z, 009Y4ZX, 009Y4ZZ, 00BT0ZX, 00BT0ZZ, 00BT3ZX, 00BT3ZZ, 00BT4ZX, 00BT4ZZ, 00BW0ZX, 00BW0ZZ, 00BW3ZX, 00BW3ZZ, 00BW4ZX, 00BW4ZZ, 00BX0ZX, 00BX0ZZ, 00BX3ZX, 00BX3ZZ, 00BX4ZX, 00BX4ZZ, 00BY0ZX, 00BY0ZZ, 00BY3ZX, 00BY3ZZ, 00BY4ZX, 00BY4ZZ, 00CT0ZZ, 00CT3ZZ, 00CT4ZZ, 00CU0ZZ, 00CU3ZZ, 00CU4ZZ, 00CW0ZZ, 00CW3ZZ, 00CW4ZZ, 00CX0ZZ, 00CX3ZZ, 00CX4ZZ, 00CY0ZZ, 00CY3ZZ, 00CY4ZZ, 00DT0ZZ, 00DT3ZZ, 00DT4ZZ, 00FU0ZZ, 00FU3ZZ, 00FU4ZZ, 00FUXZZ, 00HU01Z, 00HU02Z, 00HU03Z, 00HU0MZ, 00HU0YZ, 00HU31Z, 00HU32Z, 00HU33Z, 00HU3MZ, 00HU3YZ, 00HU41Z, 00HU42Z, 00HU43Z, 00HU4MZ, 00HU4YZ, 00HV01Z, 00HV02Z, 00HV03Z, 00HV0MZ, 00HV0YZ, 00HV31Z, 00HV32Z, 00HV33Z, 00HV3MZ, 00HV3YZ, 00HV41Z, 00HV42Z, 00HV43Z, 00HV4MZ, 00HV4YZ, 00JU0ZZ, 00JU3ZZ, 00JU4ZZ, 00JV0ZZ, 00JV3ZZ, 00JV4ZZ, 00NT0ZZ, 00NT3ZZ, 00NT4ZZ, 00NW0ZZ, 00NW3ZZ, 00NW4ZZ, 00NX0ZZ, 00NX3ZZ, 00NX4ZZ, 00NY0ZZ, 00NY3ZZ, 00NY4ZZ, 00PU00Z, 00PU02Z, 00PU03Z, 00PU0JZ, 00PU0MZ, 00PU0YZ, 00PU30Z, 00PU32Z, 00PU33Z, 00PU3JZ, 00PU3MZ, 00PU3YZ, 00PU40Z, 00PU42Z, 00PU43Z, 00PU4JZ, 00PU4MZ, 00PU4YZ, 00PUX0Z, 00PUX2Z, 00PUX3Z, 00PUXMZ, 00PV00Z, 00PV02Z, 00PV03Z, 00PV07Z, 00PV0JZ, 00PV0KZ, 00PV0MZ, 00PV0YZ, 00PV30Z, 00PV32Z, 00PV33Z, 00PV37Z, 00PV3JZ, 00PV3KZ, 00PV3MZ, 00PV3YZ, 00PV40Z, 00PV42Z, 00PV43Z, 00PV47Z, 00PV4JZ, 00PV4KZ, 00PV4MZ, 00PV4YZ, 00PVX0Z, 00PVX2Z, 00PVX3Z, 00PVXNZ, 00QT0ZZ, 00QT3ZZ, 00QT4ZZ, 00QW0ZZ, 00QW3ZZ, 00QW4ZZ, 00QX0ZZ, 00QX3ZZ, 00QX4ZZ, 00QY0ZZ, 00QY3ZZ,

00QY4ZZ, 00RT07Z, 00RT0JZ, 00RT0KZ, 00RT47Z, 00RT4JZ, 00RT4KZ,  
00SW0ZZ, 00SW3ZZ, 00SW4ZZ, 00SX0ZZ, 00SX3ZZ, 00SX4ZZ, 00SY0ZZ,  
00SY3ZZ, 00SY4ZZ, 00UT07Z, 00UT0JZ, 00UT0KZ, 00UT37Z, 00UT3JZ, 00UT3KZ,  
00UT47Z, 00UT4JZ, 00UT4KZ, 00WU00Z, 00WU02Z, 00WU03Z, 00WU0JZ,  
00WU0MZ, 00WU0YZ, 00WU30Z, 00WU32Z, 00WU33Z, 00WU3JZ, 00WU3MZ,  
00WU3YZ, 00WU40Z, 00WU42Z, 00WU43Z, 00WU4JZ, 00WU4MZ, 00WU4YZ,  
00WUX0Z, 00WUX2Z, 00WUX3Z, 00WUXJZ, 00WUXMZ, 00WV00Z, 00WV02Z,  
00WV03Z, 00WV07Z, 00WV0JZ, 00WV0KZ, 00WV0MZ, 00WV0YZ, 00WV30Z,  
00WV32Z, 00WV33Z, 00WV37Z, 00WV3JZ, 00WV3KZ, 00WV3MZ, 00WV3YZ,  
00WV40Z, 00WV42Z, 00WV43Z, 00WV47Z, 00WV4JZ, 00WV4KZ, 00WV4MZ,  
00WV4YZ, 00WVX0Z, 00WVX2Z, 00WVX3Z, 00WVX7Z, 00WVXJZ, 00WVXKZ,  
00WVXMZ, 0M5C0ZZ, 0M5C3ZZ, 0M5C4ZZ, 0M5D0ZZ, 0M5D3ZZ, 0M5D4ZZ,  
0M8C0ZZ, 0M8C3ZZ, 0M8C4ZZ, 0M8D0ZZ, 0M8D3ZZ, 0M8D4ZZ, 0M9C00Z,  
0M9C0ZX, 0M9C0ZZ, 0M9C30Z, 0M9C3ZX, 0M9C3ZZ, 0M9C40Z, 0M9C4ZX,  
0M9C4ZZ, 0M9D00Z, 0M9D0ZX, 0M9D0ZZ, 0M9D30Z, 0M9D3ZX, 0M9D3ZZ,  
0M9D40Z, 0M9D4ZX, 0M9D4ZZ, 0MBC0ZX, 0MBC0ZZ, 0MBC3ZX, 0MBC3ZZ,  
0MBC4ZX, 0MBC4ZZ, 0MBD0ZX, 0MBD0ZZ, 0MBD3ZX, 0MBD3ZZ, 0MBD4ZX,  
0MBD4ZZ, 0MCC0ZZ, 0MCC3ZZ, 0MCC4ZZ, 0MCD0ZZ, 0MCD3ZZ, 0MCD4ZZ,  
0MDC0ZZ, 0MDC3ZZ, 0MDC4ZZ, 0MDD0ZZ, 0MDD3ZZ, 0MDD4ZZ, 0MMC0ZZ,  
0MMC4ZZ, 0MMD0ZZ, 0MMD4ZZ, 0MNC0ZZ, 0MNC3ZZ, 0MNC4ZZ, 0MNCXZZ,  
0MND0ZZ, 0MND3ZZ, 0MND4ZZ, 0MNDXZZ, 0MQC0ZZ, 0MQC3ZZ, 0MQC4ZZ,  
0MQD0ZZ, 0MQD3ZZ, 0MQD4ZZ, 0MRC07Z, 0MRC0JZ, 0MRC0KZ, 0MRC47Z,  
0MRC4JZ, 0MRC4KZ, 0MRD07Z, 0MRD0JZ, 0MRD0KZ, 0MRD47Z, 0MRD4JZ,  
0MRD4KZ, 0MSC0ZZ, 0MSC4ZZ, 0MSD0ZZ, 0MSD4ZZ, 0MTC0ZZ, 0MTC4ZZ,  
0MTD0ZZ, 0MTD4ZZ, 0MUC07Z, 0MUC0JZ, 0MUC0KZ, 0MUC47Z, 0MUC4JZ,  
0MUC4KZ, 0MUD07Z, 0MUD0JZ, 0MUD0KZ, 0MUD47Z, 0MUD4JZ, 0MUD4KZ,  
0MXC0ZZ, 0MXC4ZZ, 0MXD0ZZ, 0MXD4ZZ, 0P530ZZ, 0P533ZZ, 0P534ZZ,  
0P540ZZ, 0P543ZZ, 0P544ZZ, 0P830ZZ, 0P833ZZ, 0P834ZZ, 0P840ZZ, 0P843ZZ,  
0P844ZZ, 0P9300Z, 0P930ZX, 0P930ZZ, 0P9330Z, 0P933ZX, 0P933ZZ, 0P9340Z,  
0P934ZX, 0P934ZZ, 0P9400Z, 0P940ZX, 0P940ZZ, 0P9430Z, 0P943ZX, 0P943ZZ,  
0P9440Z, 0P944ZX, 0P944ZZ, 0PB30ZX, 0PB30ZZ, 0PB33ZX, 0PB33ZZ, 0PB34ZX,  
0PB34ZZ, 0PB40ZX, 0PB40ZZ, 0PB43ZX, 0PB43ZZ, 0PB44ZX, 0PB44ZZ,  
0PC30ZZ, 0PC33ZZ, 0PC34ZZ, 0PC40ZZ, 0PC43ZZ, 0PC44ZZ, 0PD30ZZ,  
0PD40ZZ, 0PH304Z, 0PH334Z, 0PH344Z, 0PH404Z, 0PH434Z, 0PH444Z,  
0PN30ZZ, 0PN33ZZ, 0PN34ZZ, 0PN40ZZ, 0PN43ZZ, 0PN44ZZ, 0PP304Z,  
0PP307Z, 0PP30JZ, 0PP30KZ, 0PP334Z, 0PP337Z, 0PP33JZ, 0PP33KZ, 0PP344Z,  
0PP347Z, 0PP34JZ, 0PP34KZ, 0PP3X4Z, 0PP404Z, 0PP407Z, 0PP40JZ, 0PP40KZ,  
0PP434Z, 0PP437Z, 0PP43JZ, 0PP43KZ, 0PP444Z, 0PP447Z, 0PP44JZ, 0PP44KZ,  
0PP4X4Z, 0PQ30ZZ, 0PQ33ZZ, 0PQ34ZZ, 0PQ3XZZ, 0PQ40ZZ, 0PQ43ZZ,  
0PQ44ZZ, 0PQ4XZZ, 0PR307Z, 0PR30JZ, 0PR30KZ, 0PR337Z, 0PR33JZ,  
0PR33KZ, 0PR347Z, 0PR34JZ, 0PR34KZ, 0PR407Z, 0PR40JZ, 0PR40KZ,  
0PR437Z, 0PR43JZ, 0PR43KZ, 0PR447Z, 0PR44JZ, 0PR44KZ, 0PS304Z, 0PS30ZZ,  
0PS334Z, 0PS33ZZ, 0PS344Z, 0PS34ZZ, 0PS3XZZ, 0PS404Z, 0PS40ZZ, 0PS434Z,  
0PS43ZZ, 0PS444Z, 0PS44ZZ, 0PS4XZZ, 0PU307Z, 0PU30JZ, 0PU30KZ,  
0PU337Z, 0PU33JZ, 0PU33KZ, 0PU347Z, 0PU34JZ, 0PU34KZ, 0PU407Z, 0PU40JZ,  
0PU40KZ, 0PU437Z, 0PU43JZ, 0PU43KZ, 0PU447Z, 0PU44JZ, 0PU44KZ,  
0PW304Z, 0PW307Z, 0PW30JZ, 0PW30KZ, 0PW334Z, 0PW337Z, 0PW33JZ,  
0PW33KZ, 0PW344Z, 0PW347Z, 0PW34JZ, 0PW34KZ, 0PW3X4Z, 0PW3X7Z,

0PW3XJZ, 0PW3XKZ, 0PW404Z, 0PW407Z, 0PW40JZ, 0PW40KZ, 0PW434Z, 0PW437Z, 0PW43JZ, 0PW43KZ, 0PW444Z, 0PW447Z, 0PW44JZ, 0PW44KZ, 0PW4X4Z, 0PW4X7Z, 0PW4XJZ, 0PW4XKZ, 0Q500ZZ, 0Q503ZZ, 0Q504ZZ, 0Q800ZZ, 0Q803ZZ, 0Q804ZZ, 0Q9000Z, 0Q900ZX, 0Q900ZZ, 0Q9030Z, 0Q903ZX, 0Q903ZZ, 0Q9040Z, 0Q904ZX, 0Q904ZZ, 0QB00ZX, 0QB00ZZ, 0QB03ZX, 0QB03ZZ, 0QB04ZX, 0QB04ZZ, 0QC00ZZ, 0QC03ZZ, 0QC04ZZ, 0QD00ZZ, 0QH004Z, 0QH005Z, 0QH034Z, 0QH035Z, 0QH044Z, 0QH045Z, 0QN00ZZ, 0QN03ZZ, 0QN04ZZ, 0QP004Z, 0QP005Z, 0QP007Z, 0QP00JZ, 0QP00KZ, 0QP034Z, 0QP035Z, 0QP037Z, 0QP03JZ, 0QP03KZ, 0QP044Z, 0QP045Z, 0QP047Z, 0QP04JZ, 0QP04KZ, 0QP0X4Z, 0QP0X5Z, 0QQ00ZZ, 0QQ03ZZ, 0QQ04ZZ, 0QQ0XZZ, 0QR007Z, 0QR00JZ, 0QR00KZ, 0QR037Z, 0QR03JZ, 0QR03KZ, 0QR047Z, 0QR04JZ, 0QR04KZ, 0QS004Z, 0QS00ZZ, 0QS034Z, 0QS03ZZ, 0QS044Z, 0QS04ZZ, 0QS0XZZ, 0QU007Z, 0QU00JZ, 0QU00KZ, 0QU037Z, 0QU03JZ, 0QU03KZ, 0QU047Z, 0QU04JZ, 0QU04KZ, 0QW004Z, 0QW007Z, 0QW00JZ, 0QW00KZ, 0QW034Z, 0QW037Z, 0QW03JZ, 0QW03KZ, 0QW044Z, 0QW047Z, 0QW04JZ, 0QW04KZ, 0QW0X4Z, 0QW0X7Z, 0QW0XJZ, 0QW0XKZ, 0R510ZZ, 0R513ZZ, 0R514ZZ, 0R530ZZ, 0R533ZZ, 0R534ZZ, 0R540ZZ, 0R543ZZ, 0R544ZZ, 0R550ZZ, 0R553ZZ, 0R554ZZ, 0R560ZZ, 0R563ZZ, 0R564ZZ, 0R590ZZ, 0R593ZZ, 0R594ZZ, 0R5A0ZZ, 0R5A3ZZ, 0R5A4ZZ, 0R5B0ZZ, 0R5B3ZZ, 0R5B4ZZ, 0R9100Z, 0R910ZX, 0R910ZZ, 0R9130Z, 0R913ZX, 0R913ZZ, 0R9140Z, 0R914ZX, 0R914ZZ, 0R9300Z, 0R930ZX, 0R930ZZ, 0R9330Z, 0R933ZX, 0R933ZZ, 0R9340Z, 0R934ZX, 0R934ZZ, 0R9400Z, 0R940ZX, 0R940ZZ, 0R9430Z, 0R943ZX, 0R943ZZ, 0R9440Z, 0R944ZX, 0R944ZZ, 0R9500Z, 0R950ZX, 0R950ZZ, 0R9530Z, 0R953ZX, 0R953ZZ, 0R9540Z, 0R954ZX, 0R954ZZ, 0R9600Z, 0R960ZX, 0R960ZZ, 0R9630Z, 0R963ZX, 0R963ZZ, 0R9640Z, 0R964ZX, 0R964ZZ, 0R9900Z, 0R990ZX, 0R990ZZ, 0R9930Z, 0R993ZX, 0R993ZZ, 0R9940Z, 0R994ZX, 0R994ZZ, 0R9A00Z, 0R9A0ZX, 0R9A0ZZ, 0R9A30Z, 0R9A3ZX, 0R9A3ZZ, 0R9A40Z, 0R9A4ZX, 0R9A4ZZ, 0R9B00Z, 0R9B0ZX, 0R9B0ZZ, 0R9B30Z, 0R9B3ZX, 0R9B3ZZ, 0R9B40Z, 0R9B4ZX, 0R9B4ZZ, 0RB10ZX, 0RB10ZZ, 0RB13ZX, 0RB13ZZ, 0RB14ZX, 0RB14ZZ, 0RB30ZX, 0RB30ZZ, 0RB33ZX, 0RB33ZZ, 0RB34ZX, 0RB34ZZ, 0RB40ZX, 0RB40ZZ, 0RB43ZX, 0RB43ZZ, 0RB44ZX, 0RB44ZZ, 0RB50ZX, 0RB50ZZ, 0RB53ZX, 0RB53ZZ, 0RB54ZX, 0RB54ZZ, 0RB60ZX, 0RB60ZZ, 0RB63ZX, 0RB63ZZ, 0RB64ZX, 0RB64ZZ, 0RB90ZX, 0RB90ZZ, 0RB93ZX, 0RB93ZZ, 0RB94ZX, 0RB94ZZ, 0RBA0ZX, 0RBA0ZZ, 0RBA3ZX, 0RBA3ZZ, 0RBA4ZX, 0RBA4ZZ, 0RBB0ZX, 0RBB0ZZ, 0RBB3ZX, 0RBB3ZZ, 0RBB4ZX, 0RBB4ZZ, 0RC10ZZ, 0RC13ZZ, 0RC14ZZ, 0RC30ZZ, 0RC33ZZ, 0RC34ZZ, 0RC40ZZ, 0RC43ZZ, 0RC44ZZ, 0RC50ZZ, 0RC53ZZ, 0RC54ZZ, 0RC60ZZ, 0RC63ZZ, 0RC64ZZ, 0RC90ZZ, 0RC93ZZ, 0RC94ZZ, 0RCA0ZZ, 0RCA3ZZ, 0RCA4ZZ, 0RCB0ZZ, 0RCB3ZZ, 0RCB4ZZ, 0RG1070, 0RG1071, 0RG107J, 0RG10A0, 0RG10A1, 0RG10AJ, 0RG10J0, 0RG10J1, 0RG10JJ, 0RG10K0, 0RG10K1, 0RG10KJ, 0RG10Z0, 0RG10Z1, 0RG10ZJ, 0RG1370, 0RG1371, 0RG137J, 0RG13A0, 0RG13A1, 0RG13AJ, 0RG13J0, 0RG13J1, 0RG13JJ, 0RG13K0, 0RG13K1, 0RG13KJ, 0RG13Z0, 0RG13Z1, 0RG13ZJ, 0RG1470, 0RG1471, 0RG147J, 0RG14A0, 0RG14A1, 0RG14AJ, 0RG14J0, 0RG14J1, 0RG14JJ, 0RG14K0, 0RG14K1, 0RG14KJ, 0RG14Z0, 0RG14Z1, 0RG14ZJ, 0RG2070, 0RG2071, 0RG207J, 0RG20A0, 0RG20A1, 0RG20AJ, 0RG20J0, 0RG20J1, 0RG20JJ, 0RG20K0, 0RG20K1, 0RG20KJ, 0RG20Z0, 0RG20Z1, 0RG20ZJ, 0RG2370, 0RG2371, 0RG237J, 0RG23A0,

ORG23A1, ORG23AJ, ORG23J0, ORG23J1, ORG23JJ, ORG23K0, ORG23K1, ORG23KJ, ORG23Z0, ORG23Z1, ORG23ZJ, ORG2470, ORG2471, ORG247J, ORG24A0, ORG24A1, ORG24AJ, ORG24J0, ORG24J1, ORG24JJ, ORG24K0, ORG24K1, ORG24KJ, ORG24Z0, ORG24Z1, ORG24ZJ, ORG4070, ORG4071, ORG407J, ORG40A0, ORG40A1, ORG40AJ, ORG40J0, ORG40J1, ORG40JJ, ORG40K0, ORG40K1, ORG40KJ, ORG40Z0, ORG40Z1, ORG40ZJ, ORG4370, ORG4371, ORG437J, ORG43A0, ORG43A1, ORG43AJ, ORG43J0, ORG43J1, ORG43JJ, ORG43K0, ORG43K1, ORG43KJ, ORG43Z0, ORG43Z1, ORG43ZJ, ORG4470, ORG4471, ORG447J, ORG44A0, ORG44A1, ORG44AJ, ORG44J0, ORG44J1, ORG44JJ, ORG44K0, ORG44K1, ORG44KJ, ORG44Z0, ORG44Z1, ORG44ZJ, ORG6070, ORG6071, ORG607J, ORG60A0, ORG60A1, ORG60AJ, ORG60J0, ORG60J1, ORG60JJ, ORG60K0, ORG60K1, ORG60KJ, ORG60Z0, ORG60Z1, ORG60ZJ, ORG6370, ORG6371, ORG637J, ORG63A0, ORG63A1, ORG63AJ, ORG63J0, ORG63J1, ORG63JJ, ORG63K0, ORG63K1, ORG63KJ, ORG63Z0, ORG63Z1, ORG63ZJ, ORG6470, ORG6471, ORG647J, ORG64A0, ORG64A1, ORG64AJ, ORG64J0, ORG64J1, ORG64JJ, ORG64K0, ORG64K1, ORG64KJ, ORG64Z0, ORG64Z1, ORG64ZJ, ORG7070, ORG7071, ORG707J, ORG70A0, ORG70A1, ORG70AJ, ORG70J0, ORG70J1, ORG70JJ, ORG70K0, ORG70K1, ORG70KJ, ORG70Z0, ORG70Z1, ORG70ZJ, ORG7370, ORG7371, ORG737J, ORG73A0, ORG73A1, ORG73AJ, ORG73J0, ORG73J1, ORG73JJ, ORG73K0, ORG73K1, ORG73KJ, ORG73Z0, ORG73Z1, ORG73ZJ, ORG7470, ORG7471, ORG747J, ORG74A0, ORG74A1, ORG74AJ, ORG74J0, ORG74J1, ORG74JJ, ORG74K0, ORG74K1, ORG74KJ, ORG74Z0, ORG74Z1, ORG74ZJ, ORG8070, ORG8071, ORG807J, ORG80A0, ORG80A1, ORG80AJ, ORG80J0, ORG80J1, ORG80JJ, ORG80K0, ORG80K1, ORG80KJ, ORG80Z0, ORG80Z1, ORG80ZJ, ORG8370, ORG8371, ORG837J, ORG83A0, ORG83A1, ORG83AJ, ORG83J0, ORG83J1, ORG83JJ, ORG83K0, ORG83K1, ORG83KJ, ORG83Z0, ORG83Z1, ORG83ZJ, ORG8470, ORG8471, ORG847J, ORG84A0, ORG84A1, ORG84AJ, ORG84J0, ORG84J1, ORG84JJ, ORG84K0, ORG84K1, ORG84KJ, ORG84Z0, ORG84Z1, ORG84ZJ, ORGA070, ORGA071, ORGA07J, ORGA0A0, ORGA0A1, ORGA0AJ, ORGA0J0, ORGA0J1, ORGA0JJ, ORGA0K0, ORGA0K1, ORGA0KJ, ORGA0Z0, ORGA0Z1, ORGA0ZJ, ORGA370, ORGA371, ORGA37J, ORGA3A0, ORGA3A1, ORGA3AJ, ORGA3J0, ORGA3J1, ORGA3JJ, ORGA3K0, ORGA3K1, ORGA3KJ, ORGA3Z0, ORGA3Z1, ORGA3ZJ, ORGA470, ORGA471, ORGA47J, ORGA4A0, ORGA4A1, ORGA4AJ, ORGA4J0, ORGA4J1, ORGA4JJ, ORGA4K0, ORGA4K1, ORGA4KJ, ORGA4Z0, ORGA4Z1, ORGA4ZJ, ORH00BZ, ORH00CZ, ORH00DZ, ORH03BZ, ORH03CZ, ORH03DZ, ORH04BZ, ORH04CZ, ORH04DZ, ORH103Z, ORH104Z, ORH108Z, ORH10BZ, ORH10CZ, ORH10DZ, ORH133Z, ORH134Z, ORH138Z, ORH13BZ, ORH13CZ, ORH13DZ, ORH143Z, ORH144Z, ORH148Z, ORH14BZ, ORH14CZ, ORH14DZ, ORH303Z, ORH333Z, ORH343Z, ORH403Z, ORH404Z, ORH408Z, ORH40BZ, ORH40CZ, ORH40DZ, ORH433Z, ORH434Z, ORH438Z, ORH43BZ, ORH43CZ, ORH43DZ, ORH443Z, ORH444Z, ORH448Z, ORH44BZ, ORH44CZ, ORH44DZ, ORH503Z, ORH533Z, ORH543Z, ORH603Z, ORH604Z, ORH608Z, ORH60BZ, ORH60CZ, ORH60DZ, ORH633Z, ORH634Z, ORH638Z, ORH63BZ, ORH63CZ, ORH63DZ, ORH643Z, ORH644Z, ORH648Z, ORH64BZ, ORH64CZ, ORH64DZ, ORH903Z, ORH933Z, ORH943Z, ORHA03Z, ORHA04Z, ORHA08Z, ORHA0BZ, ORHA0CZ, ORHA0DZ, ORHA33Z, ORHA34Z, ORHA38Z, ORHA3BZ, ORHA3CZ, ORHA3DZ, ORHA43Z,

ORHA44Z, ORHA48Z, ORHA4BZ, ORHA4CZ, ORHA4DZ, ORHB03Z, ORHB33Z, ORHB43Z, ORJ10ZZ, ORJ13ZZ, ORJ14ZZ, ORJ1XZZ, ORJ30ZZ, ORJ33ZZ, ORJ34ZZ, ORJ3XZZ, ORJ40ZZ, ORJ43ZZ, ORJ44ZZ, ORJ4XZZ, ORJ50ZZ, ORJ53ZZ, ORJ54ZZ, ORJ5XZZ, ORJ60ZZ, ORJ63ZZ, ORJ64ZZ, ORJ6XZZ, ORJ90ZZ, ORJ93ZZ, ORJ94ZZ, ORJ9XZZ, ORJA0ZZ, ORJA3ZZ, ORJA4ZZ, ORJAXZZ, ORJB0ZZ, ORJB3ZZ, ORJB4ZZ, ORJBXZZ, ORN10ZZ, ORN13ZZ, ORN14ZZ, ORN1XZZ, ORN30ZZ, ORN33ZZ, ORN34ZZ, ORN3XZZ, ORN40ZZ, ORN43ZZ, ORN44ZZ, ORN4XZZ, ORN50ZZ, ORN53ZZ, ORN54ZZ, ORN5XZZ, ORN60ZZ, ORN63ZZ, ORN64ZZ, ORN6XZZ, ORN90ZZ, ORN93ZZ, ORN94ZZ, ORN9XZZ, ORNA0ZZ, ORNA3ZZ, ORNA4ZZ, ORNAXZZ, ORNB0ZZ, ORNB3ZZ, ORNB4ZZ, ORNBXZZ, ORP100Z, ORP103Z, ORP104Z, ORP107Z, ORP108Z, ORP10AZ, ORP10JZ, ORP10KZ, ORP130Z, ORP133Z, ORP134Z, ORP137Z, ORP138Z, ORP13AZ, ORP13JZ, ORP13KZ, ORP140Z, ORP143Z, ORP144Z, ORP147Z, ORP148Z, ORP14AZ, ORP14JZ, ORP14KZ, ORP1X0Z, ORP1X3Z, ORP1X4Z, ORP300Z, ORP303Z, ORP307Z, ORP30JZ, ORP30KZ, ORP330Z, ORP333Z, ORP337Z, ORP33JZ, ORP33KZ, ORP340Z, ORP343Z, ORP347Z, ORP34JZ, ORP34KZ, ORP3X0Z, ORP3X3Z, ORP400Z, ORP403Z, ORP404Z, ORP407Z, ORP408Z, ORP40AZ, ORP40JZ, ORP40KZ, ORP430Z, ORP433Z, ORP434Z, ORP437Z, ORP438Z, ORP43AZ, ORP43JZ, ORP43KZ, ORP440Z, ORP443Z, ORP444Z, ORP447Z, ORP448Z, ORP44AZ, ORP44JZ, ORP44KZ, ORP4X0Z, ORP4X3Z, ORP4X4Z, ORP500Z, ORP503Z, ORP507Z, ORP50JZ, ORP50KZ, ORP530Z, ORP533Z, ORP537Z, ORP53JZ, ORP53KZ, ORP540Z, ORP543Z, ORP547Z, ORP54JZ, ORP54KZ, ORP5X0Z, ORP5X3Z, ORP600Z, ORP603Z, ORP604Z, ORP607Z, ORP608Z, ORP60AZ, ORP60JZ, ORP60KZ, ORP630Z, ORP633Z, ORP634Z, ORP637Z, ORP638Z, ORP63AZ, ORP63JZ, ORP63KZ, ORP640Z, ORP643Z, ORP644Z, ORP647Z, ORP648Z, ORP64AZ, ORP64JZ, ORP64KZ, ORP6X0Z, ORP6X3Z, ORP6X4Z, ORP900Z, ORP903Z, ORP907Z, ORP90JZ, ORP90KZ, ORP930Z, ORP933Z, ORP937Z, ORP93JZ, ORP93KZ, ORP940Z, ORP943Z, ORP947Z, ORP94JZ, ORP94KZ, ORP9X0Z, ORP9X3Z, ORPA00Z, ORPA03Z, ORPA04Z, ORPA07Z, ORPA08Z, ORPA0AZ, ORPA0JZ, ORPA0KZ, ORPA30Z, ORPA33Z, ORPA34Z, ORPA37Z, ORPA38Z, ORPA3AZ, ORPA3JZ, ORPA3KZ, ORPA40Z, ORPA43Z, ORPA44Z, ORPA47Z, ORPA48Z, ORPA4AZ, ORPA4JZ, ORPA4KZ, ORPAX0Z, ORPAX3Z, ORPAX4Z, ORPB00Z, ORPB03Z, ORPB07Z, ORPB0JZ, ORPB0KZ, ORPB30Z, ORPB33Z, ORPB37Z, ORPB3JZ, ORPB3KZ, ORPB40Z, ORPB43Z, ORPB47Z, ORPB4JZ, ORPB4KZ, ORPBX0Z, ORPBX3Z, ORQ10ZZ, ORQ13ZZ, ORQ14ZZ, ORQ1XZZ, ORQ30ZZ, ORQ33ZZ, ORQ34ZZ, ORQ3XZZ, ORQ40ZZ, ORQ43ZZ, ORQ44ZZ, ORQ4XZZ, ORQ50ZZ, ORQ53ZZ, ORQ54ZZ, ORQ5XZZ, ORQ60ZZ, ORQ63ZZ, ORQ64ZZ, ORQ6XZZ, ORQ90ZZ, ORQ93ZZ, ORQ94ZZ, ORQ9XZZ, ORQA0ZZ, ORQA3ZZ, ORQA4ZZ, ORQAXZZ, ORQB0ZZ, ORQB3ZZ, ORQB4ZZ, ORQBXZZ, ORR107Z, ORR10JZ, ORR10KZ, ORR307Z, ORR30JZ, ORR30KZ, ORR407Z, ORR40JZ, ORR40KZ, ORR507Z, ORR50JZ, ORR50KZ, ORR607Z, ORR60JZ, ORR60KZ, ORR907Z, ORR90JZ, ORR90KZ, ORRA07Z, ORRA0JZ, ORRA0KZ, ORRB07Z, ORRB0JZ, ORRB0KZ, ORS104Z, ORS10ZZ, ORS134Z, ORS13ZZ, ORS144Z, ORS14ZZ, ORS1X4Z, ORS1XZZ, ORS404Z, ORS40ZZ, ORS434Z, ORS43ZZ, ORS444Z, ORS44ZZ, ORS4X4Z, ORS4XZZ, ORS604Z, ORS60ZZ, ORS634Z, ORS63ZZ, ORS644Z, ORS64ZZ, ORS6X4Z, ORS6XZZ, ORSA04Z, ORSA0ZZ, ORSA34Z, ORSA3ZZ, ORSA44Z, ORSA4ZZ, ORSAX4Z, ORSAXZZ, ORT30ZZ, ORT40ZZ, ORT50ZZ, ORT90ZZ, ORTB0ZZ,

ORU107Z, ORU10JZ, ORU10KZ, ORU137Z, ORU13JZ, ORU13KZ, ORU147Z, ORU14JZ, ORU14KZ, ORU307Z, ORU30JZ, ORU30KZ, ORU337Z, ORU33JZ, ORU33KZ, ORU347Z, ORU34JZ, ORU34KZ, ORU407Z, ORU40JZ, ORU40KZ, ORU437Z, ORU43JZ, ORU43KZ, ORU447Z, ORU44JZ, ORU44KZ, ORU507Z, ORU50JZ, ORU50KZ, ORU537Z, ORU53JZ, ORU53KZ, ORU547Z, ORU54JZ, ORU54KZ, ORU607Z, ORU60JZ, ORU60KZ, ORU637Z, ORU63JZ, ORU63KZ, ORU647Z, ORU64JZ, ORU64KZ, ORU907Z, ORU90JZ, ORU90KZ, ORU937Z, ORU93JZ, ORU93KZ, ORU947Z, ORU94JZ, ORU94KZ, ORUA07Z, ORUA0JZ, ORUA0KZ, ORUA37Z, ORUA3JZ, ORUA3KZ, ORUA47Z, ORUA4JZ, ORUA4KZ, ORUB07Z, ORUB0JZ, ORUB0KZ, ORUB37Z, ORUB3JZ, ORUB3KZ, ORUB47Z, ORUB4JZ, ORUB4KZ, ORW100Z, ORW103Z, ORW104Z, ORW107Z, ORW108Z, ORW10AZ, ORW10JZ, ORW10KZ, ORW130Z, ORW133Z, ORW134Z, ORW137Z, ORW138Z, ORW13AZ, ORW13JZ, ORW13KZ, ORW140Z, ORW143Z, ORW144Z, ORW147Z, ORW148Z, ORW14AZ, ORW14JZ, ORW14KZ, ORW1X0Z, ORW1X3Z, ORW1X4Z, ORW1X7Z, ORW1X8Z, ORW1XAZ, ORW1XJZ, ORW1XKZ, ORW300Z, ORW303Z, ORW307Z, ORW30JZ, ORW30KZ, ORW330Z, ORW333Z, ORW337Z, ORW33JZ, ORW33KZ, ORW340Z, ORW343Z, ORW347Z, ORW34JZ, ORW34KZ, ORW3X0Z, ORW3X3Z, ORW3X7Z, ORW3XJZ, ORW3XKZ, ORW400Z, ORW403Z, ORW404Z, ORW407Z, ORW408Z, ORW40AZ, ORW40JZ, ORW40KZ, ORW430Z, ORW433Z, ORW434Z, ORW437Z, ORW438Z, ORW43AZ, ORW43JZ, ORW43KZ, ORW440Z, ORW443Z, ORW444Z, ORW447Z, ORW448Z, ORW44AZ, ORW44JZ, ORW44KZ, ORW4X0Z, ORW4X3Z, ORW4X4Z, ORW4X7Z, ORW4X8Z, ORW4XAZ, ORW4XJZ, ORW4XKZ, ORW500Z, ORW503Z, ORW507Z, ORW50JZ, ORW50KZ, ORW530Z, ORW533Z, ORW537Z, ORW53JZ, ORW53KZ, ORW540Z, ORW543Z, ORW547Z, ORW54JZ, ORW54KZ, ORW5X0Z, ORW5X3Z, ORW5X7Z, ORW5XJZ, ORW5XKZ, ORW600Z, ORW603Z, ORW604Z, ORW607Z, ORW608Z, ORW60AZ, ORW60JZ, ORW60KZ, ORW630Z, ORW633Z, ORW634Z, ORW637Z, ORW638Z, ORW63AZ, ORW63JZ, ORW63KZ, ORW640Z, ORW643Z, ORW644Z, ORW647Z, ORW648Z, ORW64AZ, ORW64JZ, ORW64KZ, ORW6X0Z, ORW6X3Z, ORW6X4Z, ORW6X7Z, ORW6X8Z, ORW6XAZ, ORW6XJZ, ORW6XKZ, ORW900Z, ORW903Z, ORW907Z, ORW90JZ, ORW90KZ, ORW930Z, ORW933Z, ORW937Z, ORW93JZ, ORW93KZ, ORW940Z, ORW943Z, ORW947Z, ORW94JZ, ORW94KZ, ORW9X0Z, ORW9X3Z, ORW9X7Z, ORW9XJZ, ORW9XKZ, ORWA00Z, ORWA03Z, ORWA04Z, ORWA07Z, ORWA08Z, ORWA0AZ, ORWA0JZ, ORWA0KZ, ORWA30Z, ORWA33Z, ORWA34Z, ORWA37Z, ORWA38Z, ORWA3AZ, ORWA3JZ, ORWA3KZ, ORWA40Z, ORWA43Z, ORWA44Z, ORWA47Z, ORWA48Z, ORWA4AZ, ORWA4JZ, ORWA4KZ, ORWAX0Z, ORWAX3Z, ORWAX4Z, ORWAX7Z, ORWAX8Z, ORWAXAZ, ORWAXJZ, ORWAXKZ, ORWB00Z, ORWB03Z, ORWB07Z, ORWB0JZ, ORWB0KZ, ORWB30Z, ORWB33Z, ORWB37Z, ORWB3JZ, ORWB3KZ, ORWB40Z, ORWB43Z, ORWB47Z, ORWB4JZ, ORWB4KZ, ORWBX0Z, ORWBX3Z, ORWBX7Z, ORWBXJZ, ORWBXKZ, OS500ZZ, OS503ZZ, OS504ZZ, OS520ZZ, OS523ZZ, OS524ZZ, OS540ZZ, OS543ZZ, OS544ZZ, OS550ZZ, OS553ZZ, OS554ZZ, OS9000Z, OS900ZX, OS900ZZ, OS9030Z, OS903ZX, OS903ZZ, OS9040Z, OS904ZX, OS904ZZ, OS9200Z, OS920ZX, OS920ZZ, OS9230Z, OS923ZX, OS923ZZ, OS9240Z, OS924ZX, OS924ZZ, OS9400Z, OS940ZX, OS940ZZ, OS9430Z, OS943ZX, OS943ZZ, OS9440Z, OS944ZX, OS944ZZ, OS9500Z, OS950ZX, OS950ZZ, OS9530Z, OS953ZX, OS953ZZ, OS9540Z, OS954ZX, OS954ZZ, OSB00ZX, OSB00ZZ, OSB03ZX, OSB03ZZ, OSB04ZX, OSB04ZZ, OSB20ZX, OSB20ZZ, OSB23ZX, OSB23ZZ, OSB24ZX, OSB24ZZ, OSB40ZX, OSB40ZZ,



0SB43ZX, 0SB43ZZ, 0SB44ZX, 0SB44ZZ, 0SB50ZX, 0SB50ZZ, 0SB53ZX, 0SB53ZZ, 0SB54ZX, 0SB54ZZ, 0SC00ZZ, 0SC03ZZ, 0SC04ZZ, 0SC20ZZ, 0SC23ZZ, 0SC24ZZ, 0SC40ZZ, 0SC43ZZ, 0SC44ZZ, 0SC50ZZ, 0SC53ZZ, 0SC54ZZ, 0SG0070, 0SG0071, 0SG007J, 0SG00A0, 0SG00A1, 0SG00AJ, 0SG00J0, 0SG00J1, 0SG00JJ, 0SG00K0, 0SG00K1, 0SG00KJ, 0SG00Z0, 0SG00Z1, 0SG00ZJ, 0SG0370, 0SG0371, 0SG037J, 0SG03A0, 0SG03A1, 0SG03AJ, 0SG03J0, 0SG03J1, 0SG03JJ, 0SG03K0, 0SG03K1, 0SG03KJ, 0SG03Z0, 0SG03Z1, 0SG03ZJ, 0SG0470, 0SG0471, 0SG047J, 0SG04A0, 0SG04A1, 0SG04AJ, 0SG04J0, 0SG04J1, 0SG04JJ, 0SG04K0, 0SG04K1, 0SG04KJ, 0SG04Z0, 0SG04Z1, 0SG04ZJ, 0SG1070, 0SG1071, 0SG107J, 0SG10A0, 0SG10A1, 0SG10AJ, 0SG10J0, 0SG10J1, 0SG10JJ, 0SG10K0, 0SG10K1, 0SG10KJ, 0SG10Z0, 0SG10Z1, 0SG10ZJ, 0SG1370, 0SG1371, 0SG137J, 0SG13A0, 0SG13A1, 0SG13AJ, 0SG13J0, 0SG13J1, 0SG13JJ, 0SG13K0, 0SG13K1, 0SG13KJ, 0SG13Z0, 0SG13Z1, 0SG13ZJ, 0SG1470, 0SG1471, 0SG147J, 0SG14A0, 0SG14A1, 0SG14AJ, 0SG14J0, 0SG14J1, 0SG14JJ, 0SG14K0, 0SG14K1, 0SG14KJ, 0SG14Z0, 0SG14Z1, 0SG14ZJ, 0SG504Z, 0SG507Z, 0SG50JZ, 0SG50KZ, 0SG50ZZ, 0SG534Z, 0SG537Z, 0SG53JZ, 0SG53KZ, 0SG53ZZ, 0SG544Z, 0SG547Z, 0SG54JZ, 0SG54KZ, 0SG54ZZ, 0SH003Z, 0SH004Z, 0SH008Z, 0SH00BZ, 0SH00CZ, 0SH00DZ, 0SH033Z, 0SH034Z, 0SH038Z, 0SH03BZ, 0SH03CZ, 0SH03DZ, 0SH043Z, 0SH044Z, 0SH048Z, 0SH04BZ, 0SH04CZ, 0SH04DZ, 0SH203Z, 0SH208Z, 0SH233Z, 0SH238Z, 0SH243Z, 0SH248Z, 0SH30BZ, 0SH30CZ, 0SH30DZ, 0SH33BZ, 0SH33CZ, 0SH33DZ, 0SH34BZ, 0SH34CZ, 0SH34DZ, 0SH403Z, 0SH408Z, 0SH433Z, 0SH438Z, 0SH443Z, 0SH448Z, 0SH503Z, 0SH504Z, 0SH508Z, 0SH533Z, 0SH534Z, 0SH538Z, 0SH543Z, 0SH544Z, 0SH548Z, 0SJ00ZZ, 0SJ03ZZ, 0SJ04ZZ, 0SJ0XZZ, 0SJ20ZZ, 0SJ23ZZ, 0SJ24ZZ, 0SJ2XZZ, 0SJ40ZZ, 0SJ43ZZ, 0SJ44ZZ, 0SJ4XZZ, 0SJ50ZZ, 0SJ53ZZ, 0SJ54ZZ, 0SJ5XZZ, 0SN00ZZ, 0SN03ZZ, 0SN04ZZ, 0SN0XZZ, 0SN20ZZ, 0SN23ZZ, 0SN24ZZ, 0SN2XZZ, 0SN40ZZ, 0SN43ZZ, 0SN44ZZ, 0SN4XZZ, 0SN50ZZ, 0SN53ZZ, 0SN54ZZ, 0SN5XZZ, 0SP000Z, 0SP003Z, 0SP004Z, 0SP007Z, 0SP008Z, 0SP00AZ, 0SP00JZ, 0SP00KZ, 0SP030Z, 0SP033Z, 0SP034Z, 0SP037Z, 0SP038Z, 0SP03AZ, 0SP03JZ, 0SP03KZ, 0SP040Z, 0SP043Z, 0SP044Z, 0SP047Z, 0SP048Z, 0SP04AZ, 0SP04JZ, 0SP04KZ, 0SP0X0Z, 0SP0X3Z, 0SP0X4Z, 0SP200Z, 0SP203Z, 0SP207Z, 0SP20JZ, 0SP20KZ, 0SP230Z, 0SP233Z, 0SP237Z, 0SP23JZ, 0SP23KZ, 0SP240Z, 0SP243Z, 0SP247Z, 0SP24JZ, 0SP24KZ, 0SP2X0Z, 0SP2X3Z, 0SP400Z, 0SP403Z, 0SP407Z, 0SP40JZ, 0SP40KZ, 0SP430Z, 0SP433Z, 0SP437Z, 0SP43JZ, 0SP43KZ, 0SP440Z, 0SP443Z, 0SP447Z, 0SP44JZ, 0SP44KZ, 0SP4X0Z, 0SP4X3Z, 0SP500Z, 0SP503Z, 0SP504Z, 0SP507Z, 0SP508Z, 0SP50JZ, 0SP50KZ, 0SP530Z, 0SP533Z, 0SP534Z, 0SP537Z, 0SP538Z, 0SP53JZ, 0SP53KZ, 0SP540Z, 0SP543Z, 0SP544Z, 0SP547Z, 0SP548Z, 0SP54JZ, 0SP54KZ, 0SP5X0Z, 0SP5X3Z, 0SP5X4Z, 0SQ00ZZ, 0SQ03ZZ, 0SQ04ZZ, 0SQ0XZZ, 0SQ20ZZ, 0SQ23ZZ, 0SQ24ZZ, 0SQ2XZZ, 0SQ40ZZ, 0SQ43ZZ, 0SQ44ZZ, 0SQ4XZZ, 0SQ50ZZ, 0SQ53ZZ, 0SQ54ZZ, 0SQ5XZZ, 0SR007Z, 0SR00JZ, 0SR00KZ, 0SR207Z, 0SR20JZ, 0SR20KZ, 0SR407Z, 0SR40JZ, 0SR40KZ, 0SR507Z, 0SR50JZ, 0SR50KZ, 0SS004Z, 0SS00ZZ, 0SS034Z, 0SS03ZZ, 0SS044Z, 0SS04ZZ, 0SS0X4Z, 0SS0XZZ, 0SS504Z, 0SS50ZZ, 0SS534Z, 0SS53ZZ, 0SS544Z, 0SS54ZZ, 0SS5X4Z, 0SS5XZZ, 0ST20ZZ, 0ST40ZZ, 0ST50ZZ, 0SU007Z, 0SU00JZ, 0SU00KZ, 0SU037Z, 0SU03JZ, 0SU03KZ, 0SU047Z, 0SU04JZ, 0SU04KZ, 0SU207Z, 0SU20JZ, 0SU20KZ, 0SU237Z, 0SU23JZ, 0SU23KZ,

|                                                       |                                                                                                                                                                                                                                                                                                                                                                                                                                                                                                                                                                                                                                                                                                                                                                                                                                                                                                                                                                                                                                                                                                                                                                                                                                                                                                                                                                                                                                                                                                                                                                                                                                                                                                                                          |
|-------------------------------------------------------|------------------------------------------------------------------------------------------------------------------------------------------------------------------------------------------------------------------------------------------------------------------------------------------------------------------------------------------------------------------------------------------------------------------------------------------------------------------------------------------------------------------------------------------------------------------------------------------------------------------------------------------------------------------------------------------------------------------------------------------------------------------------------------------------------------------------------------------------------------------------------------------------------------------------------------------------------------------------------------------------------------------------------------------------------------------------------------------------------------------------------------------------------------------------------------------------------------------------------------------------------------------------------------------------------------------------------------------------------------------------------------------------------------------------------------------------------------------------------------------------------------------------------------------------------------------------------------------------------------------------------------------------------------------------------------------------------------------------------------------|
|                                                       | <p>0SU247Z, 0SU24JZ, 0SU24KZ, 0SU407Z, 0SU40JZ, 0SU40KZ, 0SU437Z, 0SU43JZ, 0SU43KZ, 0SU447Z, 0SU44JZ, 0SU44KZ, 0SU507Z, 0SU50JZ, 0SU50KZ, 0SU537Z, 0SU53JZ, 0SU53KZ, 0SU547Z, 0SU54JZ, 0SU54KZ, 0SW000Z, 0SW003Z, 0SW004Z, 0SW007Z, 0SW008Z, 0SW00AZ, 0SW00JZ, 0SW00KZ, 0SW030Z, 0SW033Z, 0SW034Z, 0SW037Z, 0SW038Z, 0SW03AZ, 0SW03JZ, 0SW03KZ, 0SW040Z, 0SW043Z, 0SW044Z, 0SW047Z, 0SW048Z, 0SW04AZ, 0SW04JZ, 0SW04KZ, 0SW0X0Z, 0SW0X3Z, 0SW0X4Z, 0SW0X7Z, 0SW0X8Z, 0SW0XAZ, 0SW0XJZ, 0SW0XKZ, 0SW200Z, 0SW203Z, 0SW207Z, 0SW20JZ, 0SW20KZ, 0SW230Z, 0SW233Z, 0SW237Z, 0SW23JZ, 0SW23KZ, 0SW240Z, 0SW243Z, 0SW247Z, 0SW24JZ, 0SW24KZ, 0SW2X0Z, 0SW2X3Z, 0SW2X7Z, 0SW2XJZ, 0SW2XKZ, 0SW400Z, 0SW403Z, 0SW407Z, 0SW40JZ, 0SW40KZ, 0SW430Z, 0SW433Z, 0SW437Z, 0SW43JZ, 0SW43KZ, 0SW440Z, 0SW443Z, 0SW447Z, 0SW44JZ, 0SW44KZ, 0SW4X0Z, 0SW4X3Z, 0SW4X7Z, 0SW4XJZ, 0SW4XKZ, 0SW500Z, 0SW503Z, 0SW504Z, 0SW507Z, 0SW508Z, 0SW50JZ, 0SW50KZ, 0SW530Z, 0SW533Z, 0SW534Z, 0SW537Z, 0SW538Z, 0SW53JZ, 0SW53KZ, 0SW540Z, 0SW543Z, 0SW544Z, 0SW547Z, 0SW548Z, 0SW54JZ, 0SW54KZ, 0SW5X0Z, 0SW5X3Z, 0SW5X4Z, 0SW5X7Z, 0SW5X8Z, 0SW5XJZ, 0SW5XKZ, 3E0R0AZ, 3E0R0E0, 3E0R0E1, 3E0R302, 3E0R303, 3E0R304, 3E0R305, 3E0R30M, 3E0R328, 3E0R329, 3E0R33Z, 3E0R36Z, 3E0R37Z, 3E0R3AZ, 3E0R3BZ, 3E0R3CZ, 3E0R3E0, 3E0R3E1, 3E0R3GC, 3E0R3HZ, 3E0R3KZ, 3E0R3NZ, 3E0R3SF, 3E0R3TZ, 3E0R7SF, 3E1R38X, 3E1R38Z, XNS0032, XNS0332, XNS0432, XNS3032, XNS3332, XNS3432, XNS4032, XNS4332, XNS4432, XNU0356, XNU4356, XRG1092, XRG10F3, XRG2092, XRG20F3, XRG4092, XRG40F3, XRG6092, XRG60F3, XRG7092, XRG70F3, XRG8092, XRG80F3, XRG092, XRG0F3, XRGB092, XRGB0F3, XRGC092, XRGC0F3</p> <p>HCPCS: C1062, C9752, C9753, C9757, S2348, S2350, S2351, S2360, S2361</p> |
| <b>Epidural and facet corticosteroid injections</b>   |                                                                                                                                                                                                                                                                                                                                                                                                                                                                                                                                                                                                                                                                                                                                                                                                                                                                                                                                                                                                                                                                                                                                                                                                                                                                                                                                                                                                                                                                                                                                                                                                                                                                                                                                          |
| Procedure Codes                                       | <p>CPT: 0213T, 0214T, 0215T, 0216T, 0217T, 0218T, 0228T, 0229T, 0230T, 0231T, 61050, 61055, 62310, 62311, 62318, 62319, 62320, 62321, 62322, 62323, 62324, 62325, 62326, 62327, 62350, 62351, 62355, 62360, 62361, 62362, 62365, 64435, 64461, 64462, 64463, 64479, 64480, 64483, 64484, 64490, 64491, 64492, 64493, 64494, 64495, 64510, 64520, 64561, 64581</p> <p>ICD-10: 3E0R33Z, 3E0R3BZ, 3E0R3CZ, 3E0S33Z, 3E0S3BZ, 3E0S3CZ</p> <p>HCPCS: J0476, J2274</p>                                                                                                                                                                                                                                                                                                                                                                                                                                                                                                                                                                                                                                                                                                                                                                                                                                                                                                                                                                                                                                                                                                                                                                                                                                                                         |
| <b>Radiofrequency ablations</b>                       |                                                                                                                                                                                                                                                                                                                                                                                                                                                                                                                                                                                                                                                                                                                                                                                                                                                                                                                                                                                                                                                                                                                                                                                                                                                                                                                                                                                                                                                                                                                                                                                                                                                                                                                                          |
| Procedure Codes                                       | <p>CPT: 64633, 64634, 64635, 64636</p> <p>ICD-10: 01510ZZ, 01513ZZ, 01514ZZ, 01580ZZ, 01583ZZ, 01584ZZ, 015B0ZZ, 015B3ZZ, 015B4ZZ</p>                                                                                                                                                                                                                                                                                                                                                                                                                                                                                                                                                                                                                                                                                                                                                                                                                                                                                                                                                                                                                                                                                                                                                                                                                                                                                                                                                                                                                                                                                                                                                                                                    |
| <b>Non-steroidal anti-inflammatory drugs (NSAIDs)</b> |                                                                                                                                                                                                                                                                                                                                                                                                                                                                                                                                                                                                                                                                                                                                                                                                                                                                                                                                                                                                                                                                                                                                                                                                                                                                                                                                                                                                                                                                                                                                                                                                                                                                                                                                          |

|                                          |                                                                                                                                                                                                |
|------------------------------------------|------------------------------------------------------------------------------------------------------------------------------------------------------------------------------------------------|
| Drug codes                               | NDC: HEDIS-2019-NDC -11-1-2018-2<br><a href="https://www.ncqa.org/hedis-2019-mld-user-manual-3/">https://www.ncqa.org/hedis-2019-mld-user-manual-3/</a>                                        |
| <b>Opioid use</b>                        |                                                                                                                                                                                                |
| Drug codes                               | NDC: Adapted CDC 2019 opioid NDC codes available by request from:<br><a href="https://www.cdc.gov/opioids/data-resources/index.html">https://www.cdc.gov/opioids/data-resources/index.html</a> |
| <b>Muscle relaxants</b>                  |                                                                                                                                                                                                |
| Drug codes                               | GENERIC NAMES containing:<br><br>'cyclobenzaprine' OR 'methocarbamol' OR 'carisoprodol' OR 'baclofen' OR<br>'chlorzoxazone' OR 'metaxalone' OR 'orphenadrine' OR 'tizanidine'                  |
| <b>Corticosteroids</b>                   |                                                                                                                                                                                                |
| Drug codes                               | NDC: HEDIS-2019-NDC -11-1-2018-2<br><a href="https://www.ncqa.org/hedis-2019-mld-user-manual-3/">https://www.ncqa.org/hedis-2019-mld-user-manual-3/</a>                                        |
| <b>Acupuncture</b>                       |                                                                                                                                                                                                |
| Procedure Code                           | CPT: 96300, 97781, 97780, 97811, 97813, 97810, 97814, 97810, 97813, 97814<br><br>ICD-10: 8E0H30Z, 8E0H300                                                                                      |
| <b>Physical therapy and chiropractor</b> |                                                                                                                                                                                                |
| Provider Specialty Code                  | Physical therapy / occupational therapy<br><br>Chiropractor: Chiropractor                                                                                                                      |

CDC = Centers for Disease Control and Prevention; CPT = Current Procedural Terminology; HCPCS = Healthcare Common Procedure Coding System; ICD-10 = 10<sup>th</sup> Revision of the International Classification of Diseases; NDC = National Drug Code; SCS = Spinal Cord Stimulator

**eTable 2.** Identification of Individuals with Conditions for Study Exclusion

| <b>Parkinson's Disease</b>            |                                                                                                                                                                 |
|---------------------------------------|-----------------------------------------------------------------------------------------------------------------------------------------------------------------|
| Diagnosis Code - ICD-10               | G20                                                                                                                                                             |
| <b>Urinary and fecal incontinence</b> |                                                                                                                                                                 |
| Diagnosis Codes - ICD-10              | N393, N3941, N3942, N3946, N39490, N39491, N39492, N39498, R159, R32, R3981                                                                                     |
| <b>Foot drop</b>                      |                                                                                                                                                                 |
| Diagnosis Code - ICD-10               | M21371, M21372, M21379                                                                                                                                          |
| <b>Malignancy and neoplastic pain</b> |                                                                                                                                                                 |
| Diagnosis Code - ICD-10               | C00XXXX-C26ZZZZ, C30XXXXX-C34ZZZZ, C37XXXX-C41ZZZZ, C45XXXX-C58ZZZZ, C60XXXX-C76ZZZZ, C77XXXX-C80ZZZZ, C81XXXX-C85ZZZZ, C88XXXX-C88ZZZZ, C90XXXX-C97ZZZZ, G89.3 |
| <b>Neurogenic bladder</b>             |                                                                                                                                                                 |
| Diagnosis Codes - ICD-10              | G834, N310, N311, N312, N318, N319                                                                                                                              |

ICD-10 = 10<sup>th</sup> Revision of the International Classification of Diseases.

**eTable 3.** Code Lists for Pain Management Outcomes

|                                                                                         |                                                                                                                                                         |
|-----------------------------------------------------------------------------------------|---------------------------------------------------------------------------------------------------------------------------------------------------------|
| <b>Opioid Use: see Appendix Table 1</b>                                                 |                                                                                                                                                         |
| <b>Epidural and facet corticosteroid injections: see Appendix Table 1</b>               |                                                                                                                                                         |
| <b>Radiofrequency ablations: see Appendix Table 1</b>                                   |                                                                                                                                                         |
| <b>Spinal surgeries: see Appendix Table 1</b>                                           |                                                                                                                                                         |
| <b>Nonsteroidal anti-inflammatory drugs: see Appendix Table 1</b>                       |                                                                                                                                                         |
| <b>Muscle relaxants: see Appendix Table 1</b>                                           |                                                                                                                                                         |
| <b>Corticosteroids: see Appendix Table 1</b>                                            |                                                                                                                                                         |
| <b>Tricyclic Antidepressants and serotonin &amp; norepinephrine reuptake inhibitors</b> |                                                                                                                                                         |
| Drug codes                                                                              | NDC: HEDIS-2019-NDC -11-1-2018-2<br><a href="https://www.ncqa.org/hedis-2019-mld-user-manual-3/">https://www.ncqa.org/hedis-2019-mld-user-manual-3/</a> |
| <b>Gabapentinoids</b>                                                                   |                                                                                                                                                         |
| Drug codes                                                                              | GENERIC NAMES containing:<br>'gabapentin' OR 'pregabalin'                                                                                               |
| <b>Benzodiazepines</b>                                                                  |                                                                                                                                                         |
| Drug codes                                                                              | NDC: HEDIS-2019-NDC -11-1-2018-2<br><a href="https://www.ncqa.org/hedis-2019-mld-user-manual-3/">https://www.ncqa.org/hedis-2019-mld-user-manual-3/</a> |

NDC = National Drug Code.

**eTable 4.** Code List for Spinal Cord Stimulator-Related Complications, Revisions and Removals

| <b>Post procedure complications</b> |                                                                                                                                                                                                                                                   |
|-------------------------------------|---------------------------------------------------------------------------------------------------------------------------------------------------------------------------------------------------------------------------------------------------|
| Diagnosis Codes - ICD-10            | T85113A, T85113D, T85113S, T85112A, T85112D, T85112S, T85123A, T85123D, T85123S, T85122A, T85122D, T85122S, T85734A, T85734D, T85734S, T85733A, T85733D, T85733S, T85193A, T85193D, T85193S, T85192A, T85192D, T85192S                            |
| <b>SCS removals and revisions</b>   |                                                                                                                                                                                                                                                   |
| Procedure Codes                     | CPT: 63661, 63662, 63688, 63663, 63664<br><br>ICD-10: 00PU0MZ, 00PU3MZ, 00PU4MZ, 00PUXMZ, 00PV0MZ, 00PV3MZ, 00PV4MZ, 00PVXMZ, 0JPT0MZ, 0JPT3MZ, 0JWT0MZ, 0JWT3MZ, 0JWTXMZ, 00WU0MZ, 00WU3MZ, 00WU4MZ, 00WUXMZ, 00WV0MZ, 00WV3MZ, 00WV4MZ, 00WVXMZ |

CPT = Current Procedural Terminology; ICD-10 = 10<sup>th</sup> Revision of the International Classification of Diseases.

**eTable 5.** Comparison of Disenrolled and Retained Enrollees

|                      | <b>Statistic</b> | <b>Total<br/>N= 205,824</b> | <b>No<br/>Disenrollment<br/>N=107,093</b> | <b>Disenrollment<br/>N=98,731</b> | <b>P-Value</b> |
|----------------------|------------------|-----------------------------|-------------------------------------------|-----------------------------------|----------------|
| Age                  | N                | 205,824                     | 107,093                                   | 98,731                            |                |
|                      | MEAN             | 62.32                       | 62.63                                     | 61.99                             | <0.001         |
|                      | STD              | 13.58                       | 13.21                                     | 13.95                             |                |
| Gender               |                  |                             |                                           |                                   |                |
| Male                 | N                | 80,197                      | 41,570                                    | 38,627                            |                |
|                      | %                | 38.97                       | 38.82                                     | 39.13                             | 0.15           |
| Female               | N                | 125,603                     | 65,513                                    | 60,090                            |                |
|                      | %                | 61.03                       | 61.18                                     | 60.87                             | 0.15           |
| Product              |                  |                             |                                           |                                   |                |
| Commercially Insured | N                | 67,607                      | 32,247                                    | 35,360                            |                |
|                      | %                | 32.85                       | 30.11                                     | 35.81                             | <0.001         |
| Medicare Advantage   | N                | 138,217                     | 74,846                                    | 63,371                            |                |
|                      | %                | 67.15                       | 69.89                                     | 64.19                             | <0.001         |
| Geography            |                  |                             |                                           |                                   |                |
| Northeast            | N                | 16,883                      | 8,829                                     | 8,054                             |                |
|                      | %                | 8.20                        | 8.24                                      | 8.16                              | 0.47           |
| Midwest              | N                | 40,245                      | 21,143                                    | 19,102                            |                |
|                      | %                | 19.55                       | 19.74                                     | 19.35                             | 0.02           |
| South*               | N                | 123,978                     | 64,175                                    | 59,803                            |                |
|                      | %                | 60.23                       | 59.92                                     | 60.57                             | 0.003          |
| West                 | N                | 24,718                      | 12,946                                    | 11,772                            |                |
|                      | %                | 12.01                       | 12.09                                     | 11.92                             | 0.25           |
| Race                 |                  |                             |                                           |                                   |                |
| Asian                | N                | 2,988                       | 1,523                                     | 1,465                             |                |
|                      | %                | 1.45                        | 1.42                                      | 1.48                              | 0.24           |
| Black                | N                | 31,943                      | 17,534                                    | 14,409                            |                |
|                      | %                | 15.52                       | 16.37                                     | 14.59                             | <0.001         |

|                                   |            |         |         |        |        |
|-----------------------------------|------------|---------|---------|--------|--------|
| Hispanic                          | N          | 17,807  | 9,175   | 8,632  |        |
|                                   | %          | 8.65    | 8.57    | 8.74   | 0.16   |
| White                             | N          | 141,285 | 75,707  | 65,578 |        |
|                                   | %          | 68.64   | 70.69   | 66.42  | <0.001 |
| Unknown/Multiple                  | N          | 11,801  | 3,154   | 8,647  |        |
|                                   | %          | 5.73    | 2.95    | 8.76   | <0.001 |
| Index Year                        |            |         |         |        |        |
| 2016                              | N          | 36,482  | 27,023  | 9,459  |        |
|                                   | %          | 21.96   | 25.26   | 15.98  | <0.001 |
| 2017                              | N          | 66,127  | 49,168  | 16,959 |        |
|                                   | %          | 39.80   | 45.96   | 28.66  | <0.001 |
| 2018                              | N          | 63,540  | 30,782  | 32,758 |        |
|                                   | %          | 38.24   | 28.78   | 55.36  | <0.001 |
| Diagnosis on Cohort Entry Date    |            |         |         |        |        |
| Failed Back Surgery               | N          | 49,354  | 26,404  | 22,950 |        |
|                                   | %          | 23.98   | 24.66   | 23.24  | <0.001 |
| Complex Regional Pain             | N          | 11,237  | 5,917   | 5,320  |        |
|                                   | %          | 5.46    | 5.53    | 5.39   | 0.17   |
| Chronic Pain                      | N          | 142,929 | 73,477  | 69,452 |        |
|                                   | %          | 69.44   | 68.61   | 70.34  | <0.001 |
| Other Chronic Back/Extremity Pain | N          | 6,334   | 3,378   | 2,956  |        |
|                                   | %          | 3.08    | 3.15    | 2.99   | 0.04   |
| Time To Treat                     | N          | 205,591 | 106,973 | 98,618 |        |
|                                   | MEAN       | 81.59   | 73.45   | 90.42  | <0.001 |
|                                   | MEDIA<br>N | 54      | 47      | 62     |        |
|                                   | STD        | 87.75   | 83.21   | 91.62  |        |
| Treatment Group                   |            |         |         |        |        |
| SCS                               | N          | 3,220   | 1,617   | 1,603  |        |
|                                   | %          | 1.56    | 1.51    | 1.62   | 0.04   |



|                                                                                                                           |   |         |         |        |      |
|---------------------------------------------------------------------------------------------------------------------------|---|---------|---------|--------|------|
| Non SCS                                                                                                                   | N | 202,604 | 105,476 | 97,128 |      |
|                                                                                                                           | % | 98.44   | 98.49   | 98.38  | 0.04 |
| * $<11$ enrollees with missing/unknown geography were combined with this category to comply with small cell requirements. |   |         |         |        |      |

**eTable 6.** Comparison of Patients With Trial Spinal Cord Stimulator Only and Patients Who Received Permanent SCS Placement

|                      | Statistic | Total<br>N=4,731 | Converted<br>N=2,691 | Not Converted<br>N=2,040 | P-<br>Value |
|----------------------|-----------|------------------|----------------------|--------------------------|-------------|
| Age                  | N         | 4,729            | 2,691                | 2,038                    |             |
|                      | MEAN      | 64.47            | 64.50                | 64.43                    | 0.83        |
|                      | STD       | 12.54            | 12.64                | 12.42                    |             |
| Gender               |           |                  |                      |                          |             |
| Male                 | N         | 1,981            | 1,109                | 872                      |             |
|                      | %         | 41.88            | 41.21                | 42.77                    | 0.28        |
| Female               | N         | 2,749            | 1,582                | 1,167                    |             |
|                      | %         | 58.12            | 58.79                | 57.23                    | 0.28        |
| Product              |           |                  |                      |                          |             |
| Commercially Insured | N         | 1,282            | 755                  | 527                      |             |
|                      | %         | 27.10            | 28.06                | 25.83                    | 0.09        |
| Medicare Advantage   | N         | 3,449            | 1,936                | 1,513                    |             |
|                      | %         | 72.90            | 71.94                | 74.17                    | 0.09        |
| Geography            |           |                  |                      |                          |             |
| Northeast            | N         | 288              | 139                  | 149                      |             |
|                      | %         | 6.09             | 5.17                 | 7.30                     | 0.002       |
| Midwest              | N         | 1,358            | 804                  | 554                      |             |
|                      | %         | 28.70            | 29.88                | 27.16                    | 0.04        |
| South*               | N         | 2,447            | 1,362                | 1,085                    |             |
|                      | %         | 51.72            | 50.61                | 53.19                    | 0.08        |
| West                 | N         | 638              | 386                  | 252                      |             |
|                      | %         | 13.49            | 14.34                | 12.35                    | 0.05        |
| Race                 |           |                  |                      |                          |             |
| Asian                | N         | 40               | 17                   | 23                       |             |
|                      | %         | 0.85             | 0.63                 | 1.13                     | 0.07        |
| Black                | N         | 501              | 285                  | 216                      |             |
|                      | %         | 10.59            | 10.59                | 10.59                    | 1.00        |

|                                                                                                                          |        |        |       |        |        |
|--------------------------------------------------------------------------------------------------------------------------|--------|--------|-------|--------|--------|
| Hispanic                                                                                                                 | N      | 338    | 175   | 163    |        |
|                                                                                                                          | %      | 7.14   | 6.50  | 7.99   | 0.05   |
| White                                                                                                                    | N      | 3,580  | 2,060 | 1,520  |        |
|                                                                                                                          | %      | 75.67  | 76.55 | 74.51  | 0.11   |
| Unknown/Multiple                                                                                                         | N      | 272    | 154   | 118    |        |
|                                                                                                                          | %      | 5.75   | 5.72  | 5.78   | 0.93   |
| SCS Year                                                                                                                 |        |        |       |        |        |
| 2016                                                                                                                     | N      | 587    | 327   | 260    |        |
|                                                                                                                          | %      | 16.27  | 16.06 | 16.55  | 0.69   |
| 2017                                                                                                                     | N      | 1,433  | 814   | 619    |        |
|                                                                                                                          | %      | 39.73  | 39.98 | 39.40  | 0.72   |
| 2018                                                                                                                     | N      | 1,587  | 895   | 692    |        |
|                                                                                                                          | %      | 44.00  | 43.96 | 44.05  | 0.96   |
| Diagnosis on Cohort Entry Date                                                                                           |        |        |       |        |        |
| Failed Back Surgery                                                                                                      | N      | 3,377  | 1,956 | 1,421  |        |
|                                                                                                                          | %      | 71.38  | 72.69 | 69.66  | 0.02   |
| Complex Regional Pain                                                                                                    | N      | 455    | 254   | 201    |        |
|                                                                                                                          | %      | 9.62   | 9.44  | 9.85   | 0.63   |
| Chronic Pain                                                                                                             | N      | 1,358  | 737   | 621    |        |
|                                                                                                                          | %      | 28.70  | 27.39 | 30.44  | 0.02   |
| Other Chronic Back/Extremity Pain                                                                                        | N      | 38     | 26    | 12     |        |
|                                                                                                                          | %      | 0.80   | 0.97  | 0.59   | 0.15   |
| Time To Treat                                                                                                            | N      | 4,731  | 2,691 | 2,040  |        |
|                                                                                                                          | MEAN   | 105.22 | 93.69 | 120.42 | <0.001 |
|                                                                                                                          | MEDIAN | 77     | 71    | 84.50  |        |
|                                                                                                                          | STD    | 102.12 | 88.09 | 116.40 |        |
|                                                                                                                          |        |        |       |        |        |
| * < 11 enrollees with missing/unknown geography were combined with this category to comply with small cell requirements. |        |        |       |        |        |

STD = Standard Deviation.

**eTable 7.** Complete List of Predictors and Odds Ratios Associated With Spinal Cord Stimulator Treatment

| <b>Predictors</b>                                           | <b>OR</b> | <b>LCL</b> | <b>UCL</b> | <b>P-value</b> |
|-------------------------------------------------------------|-----------|------------|------------|----------------|
| Gender: Female v. Male                                      | 1.05      | 0.97       | 1.15       | 0.25           |
| Race: Asian v. White                                        | 0.56      | 0.36       | 0.87       | 0.009          |
| Black v. White                                              | 0.74      | 0.65       | 0.85       | <.001          |
| Hispanic v. White                                           | 0.72      | 0.61       | 0.85       | <0.001         |
| Unknown/Multiple v. White                                   | 0.87      | 0.73       | 1.03       | 0.10           |
| Age: 18-54 v. 55-64                                         | 1.01      | 0.89       | 1.13       | 0.92           |
| 65-74 v. 55-64                                              | 1.28      | 1.15       | 1.44       | <.001          |
| 75+ v. 55-64                                                | 1.40      | 1.23       | 1.61       | <.001          |
| Product: Medicare Advantage v. Commercially Insured         | 1.03      | 0.92       | 1.15       | 0.62           |
| Geography: Midwest v. Northeast                             | 1.97      | 1.64       | 2.35       | <.001          |
| South v. Northeast                                          | 1.11      | 0.93       | 1.32       | 0.25           |
| West v. Northeast                                           | 1.81      | 1.48       | 2.20       | <.001          |
| Index year: 2017 v. 2016                                    | 1.34      | 1.18       | 1.52       | <.001          |
| 2018 v. 2016                                                | 1.43      | 1.26       | 1.63       | <.001          |
| 2019 v. 2016                                                | 1.61      | 1.40       | 1.85       | <.001          |
| Cohort entry diagnosis: Other Chronic Back/Extremity Pain   | 0.98      | 0.64       | 1.52       | 0.93           |
| Failed Back Surgery                                         | 11.40     | 9.73       | 13.36      | <.001          |
| Chronic Pain Syndrome                                       | 1.83      | 1.59       | 2.10       | <.001          |
| Complex Regional Pain                                       | 12.52     | 10.28      | 15.25      | <.001          |
| Provider Type on Day of Cohort Entry: Anesthesiologist      | 2.73      | 2.44       | 3.05       | <.001          |
| Orthopedic Surgeons                                         | 1.06      | 0.88       | 1.28       | 0.55           |
| Other MD                                                    | 0.84      | 0.69       | 1.02       | 0.07           |
| Non MD                                                      | 1.32      | 1.06       | 1.63       | 0.01           |
| Neurosurgeons                                               | 2.75      | 2.37       | 3.18       | <.001          |
| Primary Care                                                | 0.71      | 0.63       | 0.79       | <.001          |
| Rehab                                                       | 1.91      | 1.64       | 2.22       | <.001          |
| Pharmacologic Treatment During Baseline: Benzodiazepine Use | 1.01      | 0.92       | 1.11       | 0.80           |

|                                                           |      |      |      |        |
|-----------------------------------------------------------|------|------|------|--------|
| NSAIDS                                                    | 0.90 | 0.83 | 0.99 | 0.02   |
| Baseline Opioid Days: Quartile 2 vs 1                     | 0.90 | 0.79 | 1.01 | 0.07   |
| Quartile 3 vs 1                                           | 1.08 | 0.96 | 1.22 | 0.18   |
| Quartile 4 vs 2                                           | 1.13 | 1.00 | 1.28 | 0.05   |
| TCA/SNRI Antidepressant Use                               | 1.28 | 1.17 | 1.40 | <.001  |
| Gabapentinoid                                             | 1.45 | 1.34 | 1.58 | <.001  |
| Muscle Relaxants                                          | 0.92 | 0.84 | 1.00 | 0.05   |
| Oral Steroids                                             | 0.84 | 0.76 | 0.92 | <0.001 |
| Non-pharmacologic Treatments During Baseline: Acupuncture | 0.61 | 0.31 | 1.19 | 0.15   |
| Chiropractor                                              | 0.87 | 0.73 | 1.03 | 0.11   |
| Physical Therapy                                          | 0.69 | 0.61 | 0.79 | <.001  |
| Invasive baseline treatments: Spine Surgery               | 0.38 | 0.31 | 0.46 | <.001  |
| Pain Injections                                           | 1.44 | 1.32 | 1.57 | <.001  |
| Radiofrequency Ablation                                   | 4.16 | 3.26 | 5.31 | <.001  |
| Comorbidities: Alcohol Use Disorder                       | 0.75 | 0.55 | 1.01 | 0.06   |
| Blood Loss Anemia                                         | 0.71 | 0.46 | 1.10 | 0.13   |
| Cardiac Arrhythmias                                       | 1.08 | 0.96 | 1.22 | 0.21   |
| CHF                                                       | 0.91 | 0.76 | 1.08 | 0.28   |
| Coagulopathy                                              | 1.24 | 0.98 | 1.58 | 0.07   |
| Chronic Pulmonary Disease                                 | 0.94 | 0.85 | 1.03 | 0.19   |
| Deficiency Anemia                                         | 0.98 | 0.82 | 1.18 | 0.86   |
| Substance Abuse Disorder                                  | 0.95 | 0.83 | 1.09 | 0.45   |
| Depression                                                | 2.86 | 2.62 | 3.13 | <.001  |
| Diabetes - complicated                                    | 1.00 | 0.88 | 1.14 | 1.00   |
| Diabetes - uncomplicated                                  | 1.09 | 0.98 | 1.23 | 0.13   |
| Fluid and Electrolyte Disorders                           | 0.78 | 0.67 | 0.92 | 0.003  |
| HIV                                                       | 1.13 | 0.59 | 2.17 | 0.71   |
| Hypertension-complicated                                  | 0.84 | 0.70 | 1.00 | 0.05   |
| Hypothyroidism                                            | 0.96 | 0.87 | 1.07 | 0.50   |

|                                        |      |      |      |        |
|----------------------------------------|------|------|------|--------|
| Hypertension-uncomplicated             | 1.01 | 0.92 | 1.11 | 0.82   |
| Liver Disease                          | 1.11 | 0.92 | 1.33 | 0.27   |
| Obesity                                | 1.02 | 0.92 | 1.14 | 0.69   |
| Other Neurological Deficits            | 1.00 | 0.84 | 1.18 | 0.96   |
| Pulmonary Circulation Disorders        | 0.87 | 0.66 | 1.15 | 0.33   |
| Psychosis                              | 0.57 | 0.37 | 0.88 | 0.01   |
| Peptic Ulcer                           | 1.22 | 0.86 | 1.74 | 0.27   |
| Peripheral Vascular Disease            | 0.91 | 0.79 | 1.04 | 0.15   |
| Paralysis                              | 0.56 | 0.33 | 0.96 | 0.04   |
| Renal Failure                          | 1.06 | 0.91 | 1.25 | 0.46   |
| Osteoarthritis                         | 1.20 | 1.09 | 1.32 | <0.001 |
| Valvular Disease                       | 1.02 | 0.86 | 1.21 | 0.85   |
| Weight Loss                            | 0.80 | 0.61 | 1.04 | 0.10   |
| Anxiety                                | 0.94 | 0.85 | 1.04 | 0.21   |
| History of Benzodiazepine Use Disorder | 0.91 | 0.55 | 1.53 | 0.73   |
| Fibromyalgia                           | 0.82 | 0.70 | 0.96 | 0.01   |
| Osteoporosis                           | 0.99 | 0.84 | 1.17 | 0.92   |
| Pregnancy                              | 0.23 | 0.03 | 1.69 | 0.15   |
| Spine Disk Disease                     | 2.87 | 2.41 | 3.42 | <.001  |
| Traumatic Spine Injury                 | 1.02 | 0.88 | 1.18 | 0.83   |

CHF = Congestive Heart Failure; HIV = Human Immunodeficiency Virus; LCL = Lower Confidence Level; MD = Doctor of Medicine; NSAIDS = Non-Steroidal Anti-Inflammatory Drugs; OR = Odds Ratio; TCA/SNRI = Tricyclic Antidepressant/ Serotonin and Norepinephrine Reuptake Inhibitors; UCL = Upper Confidence Level.

**eTable 8.** Rates of Opioid Discontinuation Among Patients With At Least 1 Opioid Fill During 6-Month Baseline Period

| No Opioid Prescription During Months after Index Date | Total<br>N=5,854 (%) | Spinal Cord Stimulator<br>N=996 (%) | Conventional Medical Management<br>N=4,858 (%) | P-Value* |
|-------------------------------------------------------|----------------------|-------------------------------------|------------------------------------------------|----------|
| 1-12 months                                           | 516 (8.8)            | 31 (3.1)                            | 485 (10.0)                                     | <0.001   |
| 13-24 months                                          | 1,046 (17.9)         | 170 (17.1)                          | 876 (18.0)                                     | 0.47     |
| 1-24 months                                           | 306 (5.2)            | 21 (2.1)                            | 285 (5.9)                                      | <0.001   |

\*p-values are not adjusted for covariates and clustering due to propensity matching

**eTable 9.** Pain and Health Care Utilization 24 Months After Permanent Spinal Cord Stimulator Implantation vs Conventional Medical Management Among Patients With Complex Regional Pain Syndrome and Chronic Pain Syndrome Diagnoses Only

|                                                 | Months after SCS Implantation | Total N=2,155  | SCS N=361       | CMM N=1,794    | P-Value* |
|-------------------------------------------------|-------------------------------|----------------|-----------------|----------------|----------|
| <b>Surrogates of Pain</b>                       |                               |                |                 |                |          |
| <b>Average MME</b>                              | 1-12                          |                |                 |                |          |
| Mean (SD)                                       |                               | 31.8 (61.0)    | 28.0 (42.2)     | 32.5 (64.1)    | 0.10     |
| Median (IQR)                                    |                               | 9.9 (0.7-38.2) | 11.4 (1.6-36.8) | 9.6 (0.5-38.3) |          |
| <b>Average MME</b>                              | 13-24                         |                |                 |                |          |
| Mean (SD)                                       |                               | 27.0 (53.3)    | 23.2 (38.5)     | 27.7 (55.8)    | 0.06     |
| Median (IQR)                                    |                               | 5.4 (0.0-32.7) | 4.5 (0.0-30.4)  | 5.6 (0.0-33.0) |          |
| <b>Number of opioid scripts</b>                 | 1-12                          |                |                 |                |          |
| Mean (SD)                                       |                               | 8.4 (8)        | 8.7 (7.5)       | 8.3 (8.1)      | 0.44     |
| Median (IQR)                                    |                               | 7 (1-13)       | 7 (2-13)        | 7 (1-13)       |          |
| <b>Number of opioid scripts</b>                 | 13-24                         |                |                 |                |          |
| Mean (SD)                                       |                               | 7.5 (8.0)      | 7.1 (7.6)       | 7.5 (8.1)      | 0.40     |
| Median (IQR)                                    |                               | 5 (0-12)       | 5 (0-12)        | 5 (0-12)       |          |
| Chronic opioid use                              | 1-12                          | 1156 (53.6)    | 199 (55.1)      | 957 (53.3)     | 0.54     |
|                                                 | 13-24                         | 1041 (48.3)    | 173 (47.9)      | 868 (48.4)     | 0.87     |
| Long-acting opioid use                          | 1-12                          | 376 (17.5)     | 76 (21.1)       | 300 (16.7)     | 0.05     |
|                                                 | 13-24                         | 342 (15.9)     | 63 (17.5)       | 279 (15.6)     | 0.37     |
| High MME                                        | 1-12                          | 1108 (51.4)    | 224 (62.1)      | 884 (49.3)     | <0.001   |
|                                                 | 13-24                         | 900 (41.8)     | 148 (41)        | 752 (41.9)     | 0.75     |
| Epidural and facet corticosteroid injections    | 1-12                          | 634 (29.4)     | 69 (19.1)       | 565 (31.5)     | <0.001   |
|                                                 | 13-24                         | 471 (21.9)     | 82 (22.7)       | 389 (21.7)     | 0.67     |
| Radiofrequency ablation                         | 1-12                          | 181 (8.4)      | 14 (3.9)        | 167 (9.3)      | <0.001   |
|                                                 | 13-24                         | 127 (5.9)      | 16 (4.4)        | 111 (6.2)      | 0.20     |
| Advanced imaging                                | 1-12                          | 563 (26.1)     | 89 (24.7)       | 474 (26.4)     | 0.49     |
|                                                 | 13-24                         | 503 (23.3)     | 89 (24.7)       | 414 (23.1)     | 0.52     |
| Spine surgery                                   | 1-12                          | 298 (13.8)     | 39 (10.8)       | 259 (14.4)     | 0.07     |
|                                                 | 13-24                         | 192 (8.9)      | 29 (8.0)        | 163 (9.1)      | 0.52     |
| <b>Pharmacologic Treatment During Follow-up</b> |                               |                |                 |                |          |
| NSAIDs                                          | 1-12                          | 832 (38.6)     | 132 (36.6)      | 700 (39.0)     | 0.38     |
|                                                 | 13-24                         | 778 (36.1)     | 130 (36.0)      | 648 (36.1)     | 0.97     |
| Muscle relaxants                                | 1-12                          | 843 (39.1)     | 152 (42.1)      | 691 (38.5)     | 0.20     |
|                                                 | 13-24                         | 779 (36.2)     | 139 (38.5)      | 640 (35.7)     | 0.31     |
| Systemic steroids                               | 1-12                          | 717 (33.3)     | 108 (29.9)      | 609 (34.0)     | 0.14     |
|                                                 | 13-24                         | 665 (30.9)     | 114 (31.6)      | 551 (30.7)     | 0.75     |
| TCA/SNRI antidepressants                        | 1-12                          | 741 (34.4)     | 117 (32.4)      | 624 (34.8)     | 0.39     |
|                                                 | 13-24                         | 709 (32.9)     | 119 (33.0)      | 590 (32.9)     | 0.98     |
| Gabapentinoids                                  | 1-12                          | 1160 (53.8)    | 195 (54.0)      | 965 (53.8)     | 0.94     |



|                                                   |          |                       |                        |                       |        |
|---------------------------------------------------|----------|-----------------------|------------------------|-----------------------|--------|
|                                                   | 13-24    | 1033 (47.9)           | 193 (53.5)             | 840 (46.8)            | 0.02   |
| Benzodiazepines                                   | 1-12     | 776 (36.0)            | 127 (35.2)             | 649 (36.2)            | 0.72   |
|                                                   | 13-24    | 687 (31.9)            | 112 (31.0)             | 575 (32.1)            | 0.70   |
| <b>Health Care Utilization and Costs</b>          |          |                       |                        |                       |        |
| <b>All-Cause Cost of Care</b>                     |          |                       |                        |                       |        |
| <b>Total costs, PMPM</b>                          | Baseline |                       |                        |                       |        |
| Mean (SD)                                         |          | \$2233 (\$4473)       | \$1870 (\$2576)        | \$2306 (\$4762)       | 0.01   |
| Median (IQR)                                      |          | \$1091 (\$551-\$2350) | \$1075 (\$607-\$2061)  | \$1102 (\$537-\$2409) |        |
| <b>Follow-up total costs, PMPM</b>                | 1-12     |                       |                        |                       |        |
| Mean (SD)                                         |          | \$2831 (\$4225)       | \$5528 (\$4323)        | \$2288 (\$3991)       | <0.001 |
| Median (IQR)                                      |          | \$1525 (\$665-\$3644) | \$4430 (\$3196-\$6341) | \$1215 (\$561-\$2579) |        |
| <b>Follow-up total costs, PMPM</b>                | 13-24    |                       |                        |                       |        |
| Mean (SD)                                         |          | \$2072 (\$2989)       | \$2115 (\$2393)        | \$2063 (\$3096)       | 0.72   |
| Median (IQR)                                      |          | \$1065 (\$470-\$2506) | \$1344 (\$568-\$2680)  | \$1016 (\$458-\$2453) |        |
| <b>Medical costs, PMPM</b>                        | Baseline |                       |                        |                       |        |
| Mean (SD)                                         |          | \$1591 (\$4071)       | \$1234 (\$2113)        | \$1663 (\$4357)       | 0.005  |
| Median (IQR)                                      |          | \$610 (\$295-\$1456)  | \$650 (\$371-\$1236)   | \$606 (\$284-\$1542)  |        |
| <b>Follow-up medical costs, PMPM</b>              | 1-12     |                       |                        |                       |        |
| Mean (SD)                                         |          | \$2191 (\$3959)       | \$4839 (\$3957)        | \$1658 (\$3741)       | <0.001 |
| Median (IQR)                                      |          | \$925 (\$359-\$2855)  | \$3860 (\$2919-\$5422) | \$689 (\$298-\$1683)  |        |
| <b>Follow-up medical costs, PMPM</b>              | 13-24    |                       |                        |                       |        |
| Mean (SD)                                         |          | \$1415 (\$2546)       | \$1398 (\$1845)        | \$1418 (\$2665)       | 0.86   |
| Median (IQR)                                      |          | \$573 (\$245-\$1514)  | \$688 (\$277-\$1614)   | \$554 (\$234-\$1503)  |        |
| <b>Outpatient pharmacy costs, PMPM</b>            | Baseline |                       |                        |                       |        |
| Mean (SD)                                         |          | \$642 (\$1751)        | \$636 (\$1247)         | \$643 (\$1836)        | 0.92   |
| Median (IQR)                                      |          | \$248 (\$87-\$651)    | \$316 (\$98-\$689)     | \$234 (\$85-\$646)    |        |
| <b>Follow-up outpatient pharmacy costs, PMPM</b>  | 1-12     |                       |                        |                       |        |
| Mean (SD)                                         |          | \$640 (\$1291)        | \$689 (\$1448)         | \$630 (\$1257)        | 0.47   |
| Median (IQR)                                      |          | \$258 (\$89-\$681)    | \$286 (\$104-\$671)    | \$253 (\$88-\$688)    |        |
| <b>Follow-up outpatient pharmacy costs, PMPM</b>  | 13-24    |                       |                        |                       |        |
| Mean (SD)                                         |          | \$657 (\$1378)        | \$717 (\$1364)         | \$645 (\$1381)        | 0.37   |
| Median (IQR)                                      |          | \$249 (\$87-\$679)    | \$284 (\$99-\$788)     | \$241 (\$85-\$660)    |        |
| <b>All-cause health care resource utilization</b> |          |                       |                        |                       |        |
| <b>Inpatient stays</b>                            | Baseline |                       |                        |                       |        |
| Mean (SD)                                         |          | 0.1 (0.4)             | 0.1 (0.4)              | 0.2 (0.4)             | 0.02   |
| Median (IQR)                                      |          | 0 (0-0)               | 0 (0-0)                | 0 (0-0)               |        |
| <b>Follow-up inpatient stays</b>                  | 1-12     |                       |                        |                       |        |
| Mean (SD)                                         |          | 0.33 (0.79)           | 0.3 (0.7)              | 0.3 (0.8)             | 0.83   |
| Median (IQR)                                      |          | 0 (0-0)               | 0 (0-0)                | 0 (0-0)               |        |
| <b>Follow-up inpatient stays</b>                  | 13-24    |                       |                        |                       |        |

|                                |          |             |             |             |      |
|--------------------------------|----------|-------------|-------------|-------------|------|
| Mean (SD)                      |          | 0.3 (0.8)   | 0.3 (0.8)   | 0.3 (0.9)   | 0.47 |
| Median (IQR)                   |          | 0 (0-0)     | 0 (0-0)     | 0 (0-0)     |      |
| <b>ER stays</b>                | Baseline |             |             |             |      |
| Mean (SD)                      |          | 0.6 (1.6)   | 0.5 (1.6)   | 0.6 (1.6)   | 0.33 |
| Median (IQR)                   |          | 0 (0-1)     | 0 (0-1)     | 0 (0-1)     |      |
| <b>Follow-up ER stays</b>      | 1-12     |             |             |             |      |
| Mean (SD)                      |          | 1.1 (2.8)   | 1 (2.7)     | 1.1 (2.8)   | 0.50 |
| Median (IQR)                   |          | 0 (0-1)     | 0 (0-1)     | 0 (0-1)     |      |
| <b>Follow-up ER stays</b>      | 13-24    |             |             |             |      |
| Mean (SD)                      |          | 1 (2.4)     | 1 (2)       | 1 (2.5)     | 0.88 |
| Median (IQR)                   |          | 0 (0-1)     | 0 (0-1)     | 0 (0-1)     |      |
| <b>ER Days</b>                 | Baseline |             |             |             |      |
| Mean (SD)                      |          | 0.7 (2.0)   | 0.6 (1.9)   | 0.7 (2.0)   | 0.24 |
| Median (IQR)                   |          | 0 (0-1)     | 0 (0-1)     | 0 (0-1)     |      |
| <b>Follow-up ER Days</b>       | 1-12     |             |             |             |      |
| Mean (SD)                      |          | 1.3 (3.7)   | 1.2 (3.4)   | 1.4 (3.8)   | 0.45 |
| Median (IQR)                   |          | 0 (0-2)     | 0 (0-1)     | 0 (0-2)     |      |
| <b>Follow-up ER Days</b>       | 13-24    |             |             |             |      |
| Mean (SD)                      |          | 1.3 (3.5)   | 1.3 (2.7)   | 1.3 (3.6)   | 0.76 |
| Median (IQR)                   |          | 0 (0-1)     | 0 (0-2)     | 0 (0-1)     |      |
| <b>Office visits</b>           | Baseline |             |             |             |      |
| Mean (SD)                      |          | 12.3 (9.7)  | 13.1 (8.9)  | 12.1 (9.8)  | 0.06 |
| Median (IQR)                   |          | 10 (6-16)   | 11 (7-17)   | 10 (6-15)   |      |
| <b>Follow-up office visits</b> | 1-12     |             |             |             |      |
| Mean (SD)                      |          | 22.7 (17.4) | 21.8 (16.1) | 22.8 (17.7) | 0.30 |
| Median (IQR)                   |          | 19 (11-29)  | 18 (10-28)  | 19 (11-29)  |      |
| <b>Follow-up office visits</b> | 13-24    |             |             |             |      |
| Mean (SD)                      |          | 20.9 (17)   | 20.8 (16.7) | 20.9 (17.1) | 0.91 |
| Median (IQR)                   |          | 17 (9-27)   | 17 (10-26)  | 17 (9-27)   |      |

\*p-values are not adjusted for covariates and clustering due to propensity matching

CMM = Conventional Medical Management; ER = Emergency Room; IQR: Interquartile Range; MME = Morphine Milligram Equivalents; NSAIDS = Non-Steroidal Anti-Inflammatory Drugs; PMPM = Per Member Per Month; SCS = Spinal Cord Stimulator; SD = Standard Deviation; TCA/SNRI = Tricyclic Antidepressant/ Serotonin and Norepinephrine Reuptake Inhibitors.

**eTable 10.** Pain and Health Care Utilization 24 Months After Permanent Spinal Cord Stimulator Implantation vs Conventional Medical Management Among Patients With  $\leq 7$  Days Opioid Prescription During 6-Month Baseline Period

|                                                 | Months after SCS Implantation | Total N=2,068 | SCS N=310      | CMM N=1,758 | P-Value* |
|-------------------------------------------------|-------------------------------|---------------|----------------|-------------|----------|
| <b>Surrogates of Pain</b>                       |                               |               |                |             |          |
| <b>Average MME</b>                              | 1-12                          |               |                |             |          |
| Mean (SD)                                       |                               | 2.1 (9.3)     | 3.3 (12.0)     | 1.9 (8.8)   | 0.06     |
| Median (IQR)                                    |                               | 0.2 (0-1.4)   | 0.8 (0.21-2.4) | 0 (0-1.2)   |          |
| <b>Average MME</b>                              | 13-24                         |               |                |             |          |
| Mean (SD)                                       |                               | 2.5 (12.8)    | 2.8 (15.2)     | 2.4 (12.3)  | 0.63     |
| Median (IQR)                                    |                               | 0 (0-0.7)     | 0 (0-1.0)      | 0 (0-0.7)   |          |
| <b>Number of opioid scripts</b>                 | 1-12                          |               |                |             |          |
| Mean (SD)                                       |                               | 1.5 (2.7)     | 2.1 (3.3)      | 1.4 (2.5)   | <0.001   |
| Median (IQR)                                    |                               | 1 (0-2)       | 1 (1-2)        | 0 (0-2)     |          |
| <b>Number of opioid scripts</b>                 | 13-24                         |               |                |             |          |
| Mean (SD)                                       |                               | 1.4 (3.2)     | 1.5 (3.7)      | 1.4 (3.1)   | 0.60     |
| Median (IQR)                                    |                               | 0 (0-1)       | 0 (0-2)        | 0 (0-1)     |          |
| Chronic opioid use                              | 1-12                          | 116 (5.6)     | 17 (5.5)       | 99 (5.6)    | 0.92     |
|                                                 | 13-24                         | 134 (6.5)     | 18 (5.8)       | 116 (6.6)   | 0.60     |
| Long-acting opioid use                          | 1-12                          | 43 (2.1)      | 13 (4.2)       | 30 (1.7)    | 0.005    |
|                                                 | 13-24                         | 53            | <11            | >42         | 0.98     |
| High MME                                        | 1-12                          | 382 (18.5)    | 118 (38.1)     | 264 (15)    | <0.001   |
|                                                 | 13-24                         | 279 (13.5)    | 49 (15.8)      | 230 (13.1)  | 0.20     |
| Epidural and facet corticosteroid injections    | 1-12                          | 714 (34.5)    | 47 (15.2)      | 667 (37.9)  | <0.001   |
|                                                 | 13-24                         | 451 (21.8)    | 64 (20.7)      | 387 (22)    | 0.59     |
| Radiofrequency ablation                         | 1-12                          | 165           | <11            | >154        | <0.001   |
|                                                 | 13-24                         | 98 (4.7)      | 11 (3.6)       | 87 (5)      | 0.28     |
| Advanced imaging                                | 1-12                          | 612 (29.6)    | 70 (22.6)      | 542 (30.8)  | 0.003    |
|                                                 | 13-24                         | 535 (25.9)    | 83 (26.8)      | 452 (25.7)  | 0.69     |
| Spine surgery                                   | 1-12                          | 392 (19)      | 35 (11.3)      | 357 (20.3)  | <0.001   |
|                                                 | 13-24                         | 220 (10.6)    | 27 (8.7)       | 193 (11)    | 0.23     |
| <b>Pharmacologic Treatment During Follow-up</b> |                               |               |                |             |          |
| NSAIDs                                          | 1-12                          | 740 (35.8)    | 93 (30)        | 647 (36.8)  | 0.02     |
|                                                 | 13-24                         | 632 (30.6)    | 91 (29.4)      | 541 (30.8)  | 0.62     |
| Muscle relaxants                                | 1-12                          | 616 (29.8)    | 97 (31.3)      | 519 (29.5)  | 0.53     |
|                                                 | 13-24                         | 531 (25.7)    | 70 (22.6)      | 461 (26.2)  | 0.18     |
| Systemic steroids                               | 1-12                          | 645 (31.2)    | 87 (28.1)      | 558 (31.7)  | 0.20     |
|                                                 | 13-24                         | 623 (30.1)    | 93 (30)        | 530 (30.2)  | 0.96     |
| TCA/SNRI antidepressants                        | 1-12                          | 470 (22.7)    | 75 (24.2)      | 395 (22.5)  | 0.50     |
|                                                 | 13-24                         | 465 (22.5)    | 87 (28.1)      | 378 (21.5)  | 0.01     |

|                                                   |          |                       |                        |                      |        |
|---------------------------------------------------|----------|-----------------------|------------------------|----------------------|--------|
| Gabapentinoids                                    | 1-12     | 844 (40.81)           | 128 (41.3)             | 716 (40.7)           | 0.85   |
|                                                   | 13-24    | 781 (37.8)            | 129 (41.6)             | 652 (37.1)           | 0.13   |
| Benzodiazepines                                   | 1-12     | 533 (25.8)            | 80 (25.8)              | 453 (25.8)           | 0.99   |
|                                                   | 13-24    | 485 (23.5)            | 61 (19.7)              | 424 (24.1)           | 0.09   |
| <b>Health Care Utilization and Costs</b>          |          |                       |                        |                      |        |
| <b>All-Cause Cost of Care</b>                     |          |                       |                        |                      |        |
| <b>Total costs, PMPM</b>                          | Baseline |                       |                        |                      |        |
| Mean (SD)                                         |          | \$1596 (\$4252)       | \$1348 (\$1874)        | \$1640 (\$4543)      | 0.05   |
| Median (IQR)                                      |          | \$799 (\$400-\$1640)  | \$808 (\$450-\$1514)   | \$792 (\$388-\$1668) |        |
| <b>Follow-up total costs, PMPM</b>                | 1-12     |                       |                        |                      |        |
| Mean (SD)                                         |          | \$2526 (\$5233)       | \$4917 (\$3856)        | \$2105 (\$5331)      | <0.001 |
| Median (IQR)                                      |          | \$1217 (\$498-\$3088) | \$4236 (\$2992-\$5530) | \$969 (\$428-\$2173) |        |
| <b>Follow-up total costs, PMPM</b>                | 13-24    |                       |                        |                      |        |
| Mean (SD)                                         |          | \$1813 (\$4545)       | \$1759 (\$2290)        | \$1823 (\$4835)      | 0.71   |
| Median (IQR)                                      |          | \$827 (\$346-\$1952)  | \$1008 (\$438-\$2094)  | \$784 (\$338-\$1911) |        |
| <b>Medical costs, PMPM</b>                        | Baseline |                       |                        |                      |        |
| Mean (SD)                                         |          | \$1144 (\$2297)       | \$861 (\$1318)         | \$1194 (\$2426)      | <0.001 |
| Median (IQR)                                      |          | \$530 (\$269-\$1087)  | \$519 (\$292-\$935)    | \$539 (\$266-\$1137) |        |
| <b>Follow-up medical costs, PMPM</b>              | 1-12     |                       |                        |                      |        |
| Mean (SD)                                         |          | \$2032 (\$3487)       | \$4416 (\$3572)        | \$1612 (\$3298)      | <0.001 |
| Median (IQR)                                      |          | \$824 (\$321-\$2559)  | \$3770 (\$2749-\$5073) | \$647 (\$273-\$1619) |        |
| <b>Follow-up medical costs, PMPM</b>              | 13-24    |                       |                        |                      |        |
| Mean (SD)                                         |          | \$1318 (\$2852)       | \$1270 (\$1932)        | \$1326 (\$2985)      | 0.66   |
| Median (IQR)                                      |          | \$509 (\$204-\$1326)  | \$532 (\$265-\$1465)   | \$506 (\$196-\$1302) |        |
| <b>Outpatient pharmacy costs, PMPM</b>            | Baseline |                       |                        |                      |        |
| Mean (SD)                                         |          | \$453 (\$3540)        | \$487 (\$1248)         | \$447 (\$3804)       | 0.73   |
| Median (IQR)                                      |          | \$108 (\$36-\$387)    | \$167 (\$54-\$470)     | \$99 (\$34-\$373)    |        |
| <b>Follow-up outpatient pharmacy costs, PMPM</b>  | 1-12     |                       |                        |                      |        |
| Mean (SD)                                         |          | \$494 (\$3798)        | \$500 (\$1231)         | \$493 (\$4088)       | 0.95   |
| Median (IQR)                                      |          | \$132 (\$46-\$414)    | \$181 (\$62-\$482)     | \$125 (\$44-\$397)   |        |
| <b>Follow-up outpatient pharmacy costs, PMPM</b>  | 13-24    |                       |                        |                      |        |
| Mean (SD)                                         |          | \$495 (\$3486)        | \$489 (\$1242)         | \$496 (\$3746)       | 0.95   |
| Median (IQR)                                      |          | \$130 (\$47-\$423)    | \$176 (\$66-\$521)     | \$122 (\$45-\$406)   |        |
| <b>All-Cause Health Care Resource Utilization</b> |          |                       |                        |                      |        |
| <b>Inpatient stays</b>                            | Baseline |                       |                        |                      |        |
| Mean (SD)                                         |          | 0.1 (0.3)             | 0.1 (0.3)              | 0.1 (0.3)            | 0.11   |
| Median (IQR)                                      |          | 0 (0-0)               | 0 (0-0)                | 0 (0-0)              |        |
| <b>Follow-up inpatient stays</b>                  | 1-12     |                       |                        |                      |        |
| Mean (SD)                                         |          | 0.3 (0.7)             | 0.3 (0.6)              | 0.3 (0.7)            | 0.81   |
| Median (IQR)                                      |          | 0 (0-0)               | 0 (0-0)                | 0 (0-0)              |        |
| <b>Follow-up inpatient stays</b>                  | 13-24    |                       |                        |                      |        |

|                                |          |             |             |             |      |
|--------------------------------|----------|-------------|-------------|-------------|------|
| Mean (SD)                      |          | 0.3 (0.7)   | 0.3 (0.6)   | 0.3 (0.7)   | 0.92 |
| Median (IQR)                   |          | 0 (0-0)     | 0 (0-0)     | 0 (0-0)     |      |
| <b>ER stays</b>                | Baseline |             |             |             |      |
| Mean (SD)                      |          | 0.3 (0.9)   | 0.3 (0.6)   | 0.3 (0.9)   | 0.87 |
| Median (IQR)                   |          | 0 (0-0)     | 0 (0-0)     | 0 (0-0)     |      |
| <b>Follow-up ER stays</b>      | 1-12     |             |             |             |      |
| Mean (SD)                      |          | 0.7 (1.5)   | 0.7 (1.1)   | 0.7 (1.5)   | 0.88 |
| Median (IQR)                   |          | 0 (0-1)     | 0 (0-1)     | 0 (0-1)     |      |
| <b>Follow-up ER stays</b>      | 13-24    |             |             |             |      |
| Mean (SD)                      |          | 0.7 (1.4)   | 0.7 (1.2)   | 0.7 (1.4)   | 0.50 |
| Median (IQR)                   |          | 0 (0-1)     | 0 (0-1)     | 0 (0-1)     |      |
| <b>ER Days</b>                 | Baseline |             |             |             |      |
| Mean (SD)                      |          | 0.3 (1.1)   | 0.3 (0.8)   | 0.3 (1.2)   | 0.76 |
| Median (IQR)                   |          | 0 (0-0)     | 0 (0-0)     | 0 (0-0)     |      |
| <b>Follow-up ER Days</b>       | 1-12     |             |             |             |      |
| Mean (SD)                      |          | 0.8 (1.9)   | 0.8 (1.5)   | 0.8 (1.9)   | 0.94 |
| Median (IQR)                   |          | 0 (0-1)     | 0 (0-1)     | 0 (0-1)     |      |
| <b>Follow-up ER Days</b>       | 13-24    |             |             |             |      |
| Mean (SD)                      |          | 0.8 (1.9)   | 0.9 (1.7)   | 0.8 (1.9)   | 0.55 |
| Median (IQR)                   |          | 0 (0-1)     | 0 (0-1)     | 0 (0-1)     |      |
| <b>Office visits</b>           | Baseline |             |             |             |      |
| Mean (SD)                      |          | 11.4 (9.4)  | 12.2 (8.9)  | 11.3 (9.5)  | 0.11 |
| Median (IQR)                   |          | 9 (5-15)    | 10 (6-16)   | 9 (5-15)    |      |
| <b>Follow-up office visits</b> | 1-12     |             |             |             |      |
| Mean (SD)                      |          | 21.2 (17.3) | 20.2 (14.7) | 21.3 (17.7) | 0.23 |
| Median (IQR)                   |          | 17 (10-28)  | 16 (9-28)   | 17 (10-28)  |      |
| <b>Follow-up office visits</b> | 13-24    |             |             |             |      |
| Mean (SD)                      |          | 19.5 (17.2) | 20 (17.2)   | 19.5 (17.2) | 0.62 |
| Median (IQR)                   |          | 15 (9-25)   | 16 (9-26)   | 15 (8-25)   |      |

\*p-values are not adjusted for covariates and clustering due to propensity matching

NA = cell suppressed because of values <11

CMM = Conventional Medical Management; ER = Emergency Room; IQR: Interquartile Range; MME = Morphine Milligram Equivalents; NSAIDS = Non-Steroidal Anti-Inflammatory Drugs; PMPM = Per Member Per Month; SCS = Spinal Cord Stimulator; SD = Standard Deviation; TCA/SNRI = Tricyclic Antidepressant/ Serotonin and Norepinephrine Reuptake Inhibitors.

**eFigure 1. Flow Diagram of Cohort Construction**

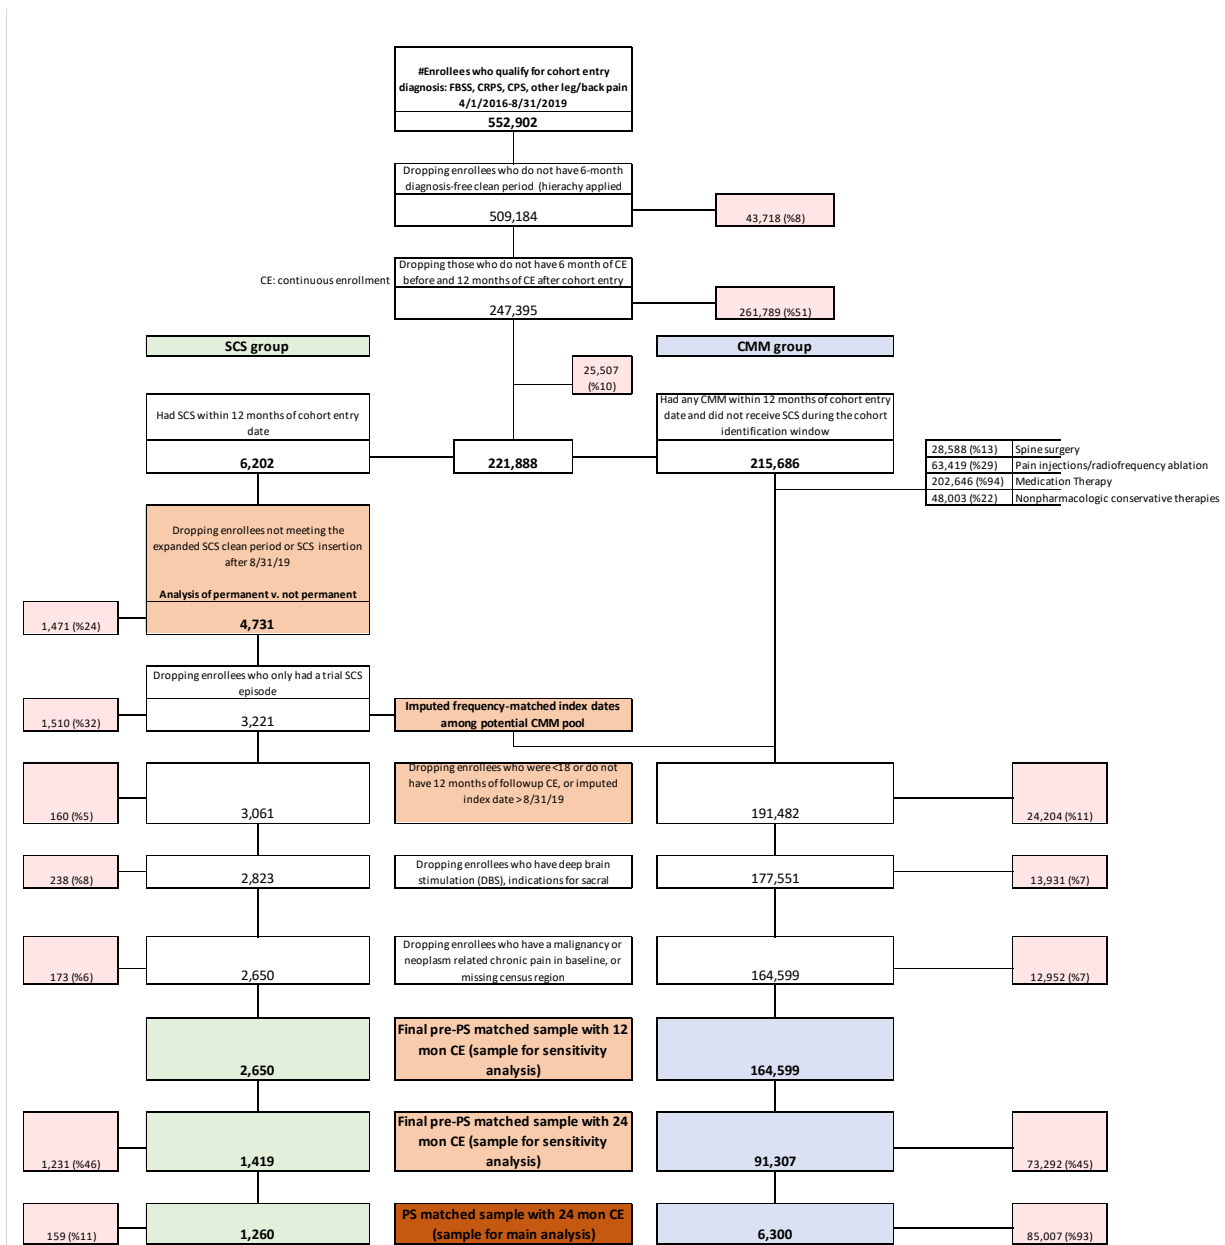

CE = Continuous Enrollment; CMM = conventional medical management; CRPS = Complex Regional Pain Syndrome; FBSS = Failed Back Surgery Syndrome; SCS = spinal cord stimulator

**eFigure 2. Overall Study Design Key Time Periods and Events**

Cohort identification period: April 2016 through August 2018

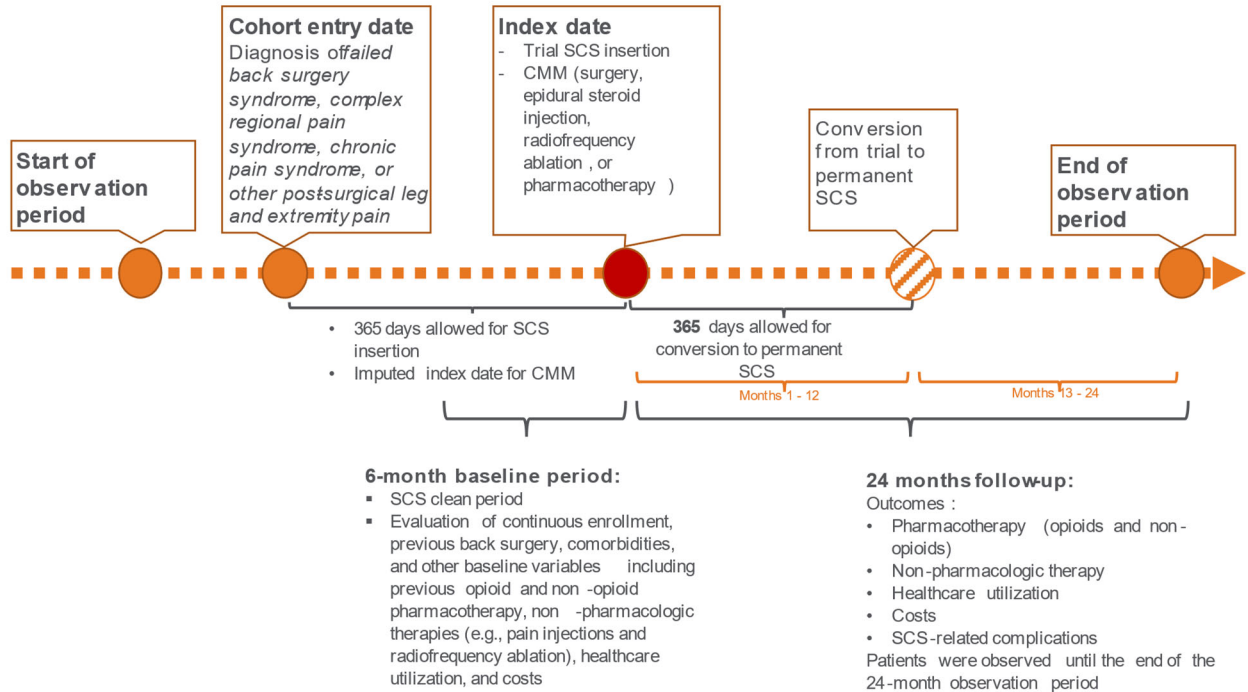

CMM = conventional medical management; SCS = Spinal Cord Stimulator

**eFigure 3. Prematch and Postmatch Standardized Mean Difference**

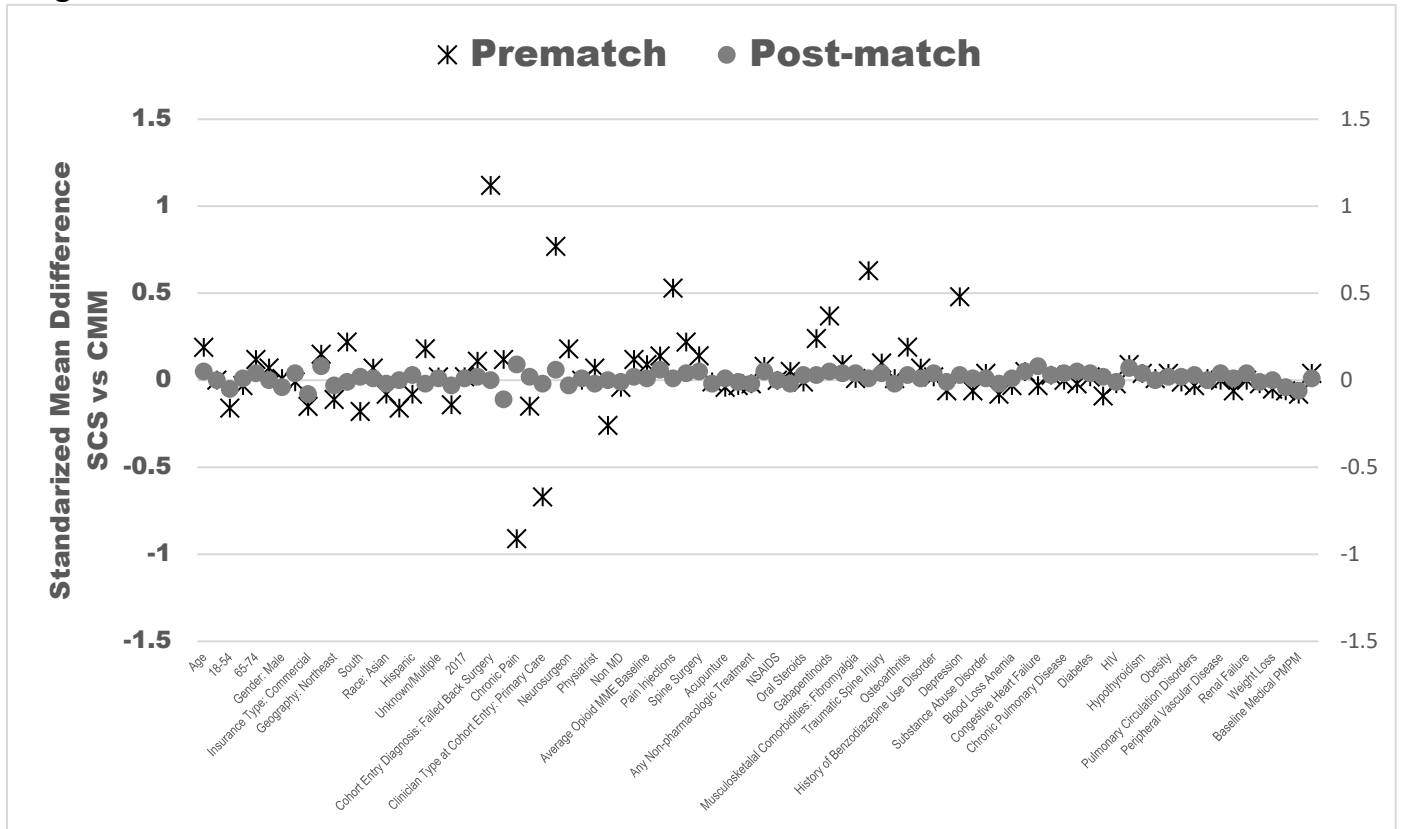

HIV = Human Immunodeficiency Virus; MD = Doctor of Medicine; NSAIDs = Non-Steroidal Anti-Inflammatory Drugs; PMPM = Per Member Per Month; SD = Standard Deviation; TCA/SNRI = Tricyclic Antidepressant/ Serotonin and Norepinephrine Reuptake Inhibitors; TCOC = Total Costs of Care
